# Supplementary material for: A dragon fruit peel-derived heterogeneous catalyst for Michael addition reactions and methanolysis of PET waste: a green and dual-functional approach
Source: Royal Society of Chemistry journal article supplement (doi:10.1039/d5va00253b), 2025-10-30
Supplement: d5va00253b1.pdf [file d5va00253b1.pdf]

## Dragon Fruit Peel-Derived Heterogeneous Catalyst for Michael Addition Reactions and Methanolysis of PET Waste: A Green and Dual-Functional Approach

Vanlalngaihawma Khiangte,<sup>a,b,1</sup> Samson Lalhmangaihzualla,<sup>a,1</sup> ZT Laldinpuii,<sup>a,b</sup> Khiangte Vanlaldinpuia<sup>a\*</sup>

<sup>a</sup>Department of Chemistry, Pachhunga University College, Mizoram University, Aizawl, 796001, Mizoram, India.

<sup>b</sup>Department of Chemistry, Mizoram University, Aizawl, Mizoram, 796001, India.

\*Corresponding authors: [mapuiakhiangte@pucollege.edu.in](mailto:mapuiakhiangte@pucollege.edu.in)

<sup>1</sup>Equal contributions for the first two authors.

| Contents                                                                                         | Page No. |
|--------------------------------------------------------------------------------------------------|----------|
| Characterization of DFPA catalyst                                                                | 2 - 6    |
| Pressure Calculation using NIST Antoine equation                                                 | 7        |
| NMR data of Michael Adducts                                                                      | 7 - 11   |
| <sup>1</sup> H and <sup>13</sup> C NMR spectra of Michael Addition Products                      | 12 - 27  |
| Table S2: Reusability of DFPA Catalyst for Methanolysis of PET waste                             | 28       |
| Figure S21: EDX analysis of DFPA after 5th cycle                                                 | 28       |
| Figure S22: EDX analysis of DFPA catalyst after 10th cycle                                       | 29       |
| Figure S23: SEM images of 5th (a) and 10th (b) cycles                                            | 29       |
| HPLC spectra of crude and recrystallized methanolysis product                                    | 30       |
| FT-IR Spectra of recrystallized methanolysis product                                             | 31       |
| <sup>13</sup> C NMR spectra of dimethyl terephthalate (DMT)                                      | 31       |
| Figure S28: (a) Leverage vs run plot. (b) Residuals vs Run plot                                  | 32       |
| Table S3: Methanolysis data of colored and labeled PET                                           | 32       |
| Figure S29: (a) UV spectra of colored PET solution. (b) UV spectra of recrystallized colored DMT | 32       |
| Table S4: Determination of Energy Input in kWh/Kg(DMT) on methanolysis                           | 33       |
| Table S5: Green Metrics of Methanolysis reaction                                                 | 34       |
| Table S6: Mass Balance of Methanolysis Reaction                                                  | 34       |
| Table S7: Green Metrics of Michael Addition Reaction                                             | 34       |

### Characterization of DFPA Catalyst (Provided for Reference Only)

Since the DFPA catalyst was not freshly synthesized for this study, no additional characterization was conducted.[1] For reference, the previously reported characterization data are briefly summarized, and Temperature Programmed Desorption (NH<sub>3</sub> and CO<sub>2</sub> TPD) analysis was added additionally. As illustrated in **Table S1**, XRF results confirm potassium oxide (59.02%) as the predominant component, followed by MgO, CaO, and SiO<sub>2</sub> in varying concentrations. The excellent catalytic performance is attributed to the presence of these basic metal oxides, which act as active sites, and the synergistic effect of the mixed oxides.[2]

Table S1: XRF analysis of DFPA result.

| Sl. No. | Chemical Component             | Mass % |
|---------|--------------------------------|--------|
| 1.      | K <sub>2</sub> O               | 59.02  |
| 2.      | MgO                            | 5.71   |
| 3.      | NiO                            | 4.86   |
| 4.      | CaO                            | 3.18   |
| 5.      | SiO <sub>2</sub>               | 2.41   |
| 6.      | Cr <sub>2</sub> O <sub>3</sub> | 0.10   |
| 7.      | Al <sub>2</sub> O <sub>3</sub> | 0.04   |
| 8.      | MnO                            | 0.03   |

FT-IR spectra (see Figure S1a) show characteristic carbonate vibrations (1365, 1041, 879 cm<sup>-1</sup>), metal–oxygen stretches (771, 702 cm<sup>-1</sup>), M–O–K vibration (2167 cm<sup>-1</sup>), and CO<sub>2</sub> adsorption band (2360 cm<sup>-1</sup>), consistent with our previous findings.[3–5] Nitrogen adsorption–desorption analysis (see **Figure S1b**) of the catalyst exhibits a type IV isotherm with an H3-type hysteresis loop, characteristic of mesoporous materials.[6] The isotherm reveals monolayer adsorption at low relative pressure (P/P°), followed by multilayer adsorption at intermediate pressures and capillary condensation at higher P/P°, as indicated by the desorption hysteresis.[6,7] Pore size distribution as shown in **Figure S1c**, determined using the Barrett-Joyner-Halenda (BJH) method, ranged from 3.09 to 24.57 nm, with an average pore diameter

of 3.450 nm. The BET surface area and total pore volume were found to be 1.290 m<sup>2</sup>/g and 0.004 cm<sup>3</sup>/g, respectively. These mesoporous characteristics and moderate surface area are considered essential for catalysis. Distinct diffraction peaks observed in the XRD pattern of DFPA correspond to K<sub>2</sub>O (JCPDS Nos. 77-2176, 77-2151) and K<sub>2</sub>CO<sub>3</sub> (JCPDS No. 71-1466) at 2 $\theta$  = 25.382°, 27.952°, 29.465°, 32.092°, 37.975°, 39.041°, 41.148°, 45.468°, and 57.561° (see Figure S1d). Additional peaks were assigned to CaO (JCPDS No. 82-1691), CaCO<sub>3</sub> (JCPDS No. 87-1863), and MgO (JCPDS No. 65-0476) at 2 $\theta$  = 30.328°, 32.300°, 37.057°, 43.196°, and 54.395°. Minor crystalline phases, including SiO<sub>2</sub> (JCPDS No. 89-8949), Cr<sub>2</sub>O<sub>3</sub> (JCPDS No. 84-0315), NiCO<sub>3</sub> (JCPDS No. 78-0210), and KCl (JCPDS No. 89-3619), were also detected at 2 $\theta$  = 26.009°, 28.338°, 33.156°, 33.878°, 40.502°, 50.144°, and 58.665°.

Thermogravimetric analysis (see **Figure S2a**) demonstrated the thermal stability of DFPA, with an initial weight loss (7–13%) between 100–200 °C due to moisture evaporation, followed by decomposition of carbonates at higher temperatures. EDX analysis (as shown in Figure S2b) further confirmed the elemental composition, showing the presence of K (42.36%), O (39.46%), Ca (7.98%), Mg (4.30%), Cl (3.76%), P (1.31%), C (0.60%), and S (0.25%). Morphological analysis using SEM and TEM images (see **Figure S3**) revealed a rough, spongy surface morphology with abundant pores, supporting the mesoporous nature of DFPA. The particle sizes were estimated to range from 4–20 nm. As seen in **Figure S4**, XPS analysis confirmed the presence of Mg, Na, O, Ca, K, and C on the DFPA surface. The C 1s spectrum showed peaks at 284.84 eV and 288.94 eV, corresponding to C–C and C=O of carbonates.[2] The O1s peak at 530.86 eV indicated metal oxides,[3] while the K2p peaks at 295.08 eV and 292.44 eV confirmed K<sub>2</sub>O and K<sub>2</sub>CO<sub>3</sub>. [8] Peaks at 346.61 eV, 350.52 eV (Ca2p), and 1303.94 eV (Mg1s) were assigned to CaO, CaCO<sub>3</sub>, and MgO,[9] respectively. These results support the mixed metal oxide and carbonate composition revealed by XRD, XRF, and FT-IR analyses.

Temperature programmed desorption analysis using CO<sub>2</sub> and NH<sub>3</sub> confirms the presence of basic and acidic sites on the catalyst, as shown in **Figure S4g**. CO<sub>2</sub>-TPD profile exhibited three desorption peaks at 148.4 °C, 207.5 °C, and 441.6 °C, corresponding to weak, moderate, and strong basic sites, respectively. Meanwhile, the presence of weak and strong acidic sites was also confirmed as their corresponding peaks were observed at 206.5 °C and 450 °C in the NH<sub>3</sub>-TPD profile. However, as evident from the profiles, the basic character predominates over the acidic nature, with the quantified basicity (0.462 mmol g<sup>-1</sup>) exceeding the total acidity (0.393 mmol g<sup>-1</sup>).

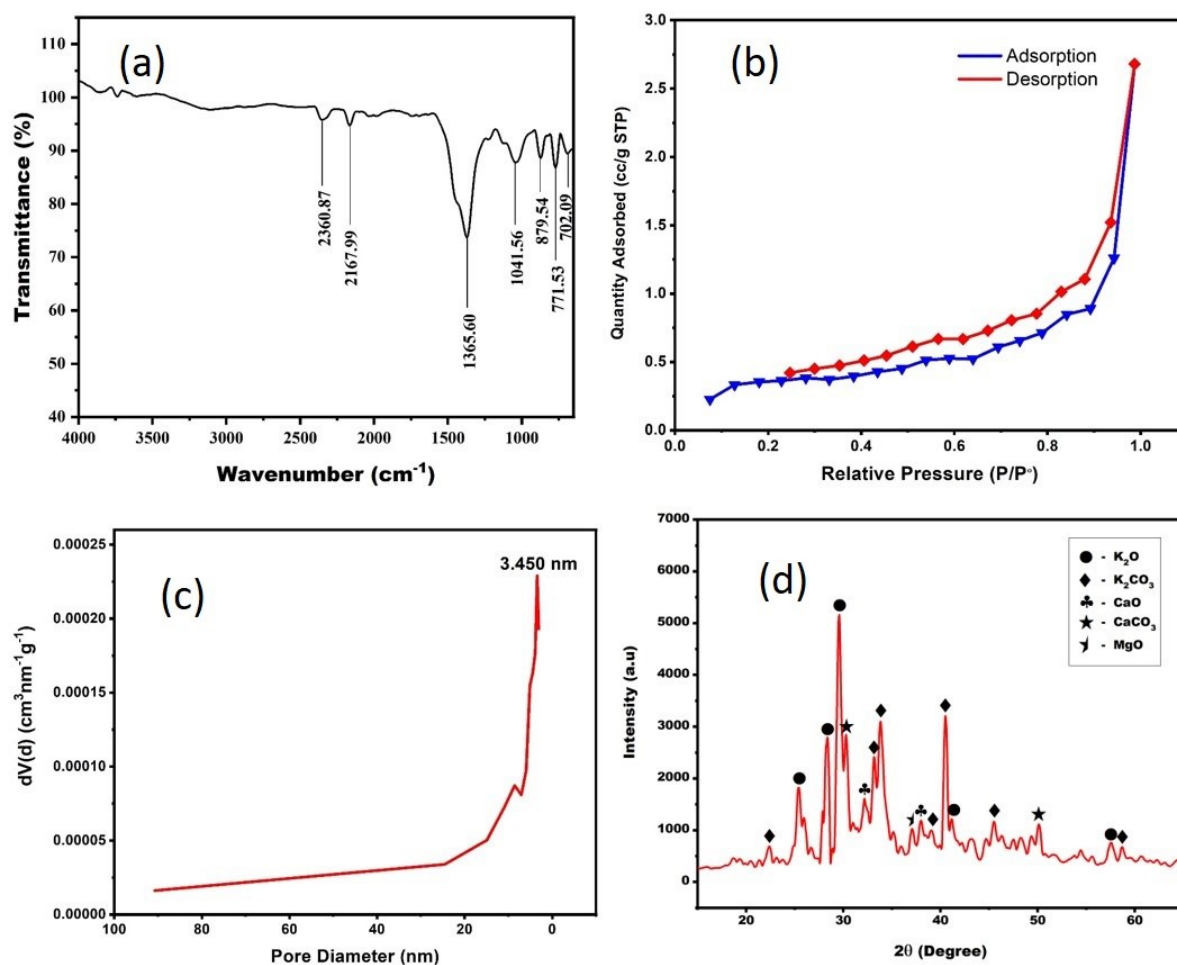

**Figure S1:** (a) FT-IR spectrum of DFPA; (b)  $\text{N}_2$  adsorption-desorption isotherm of DFPA; (c) DFPA pore size distribution; (d) XRD data of DFPA.

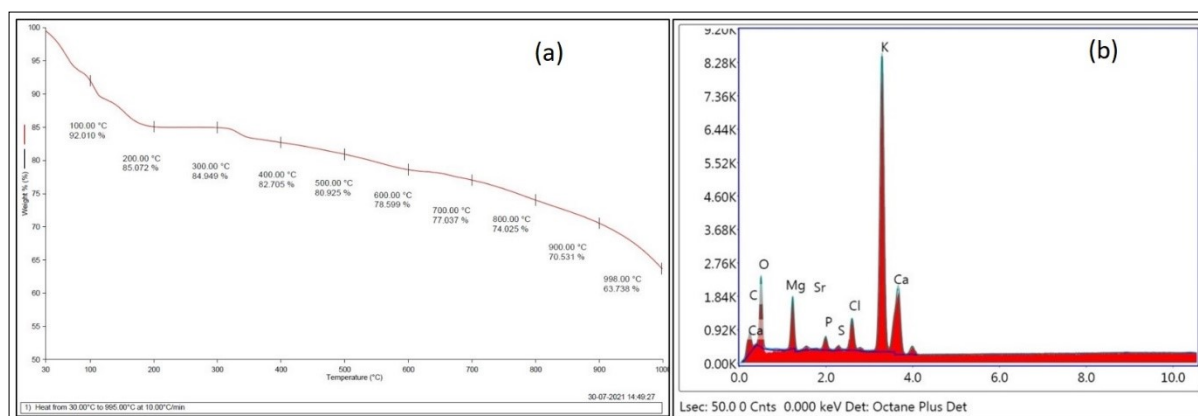

**Figure S2:** (a) TGA data of DFPA; (b) EDX spectra of DFPA

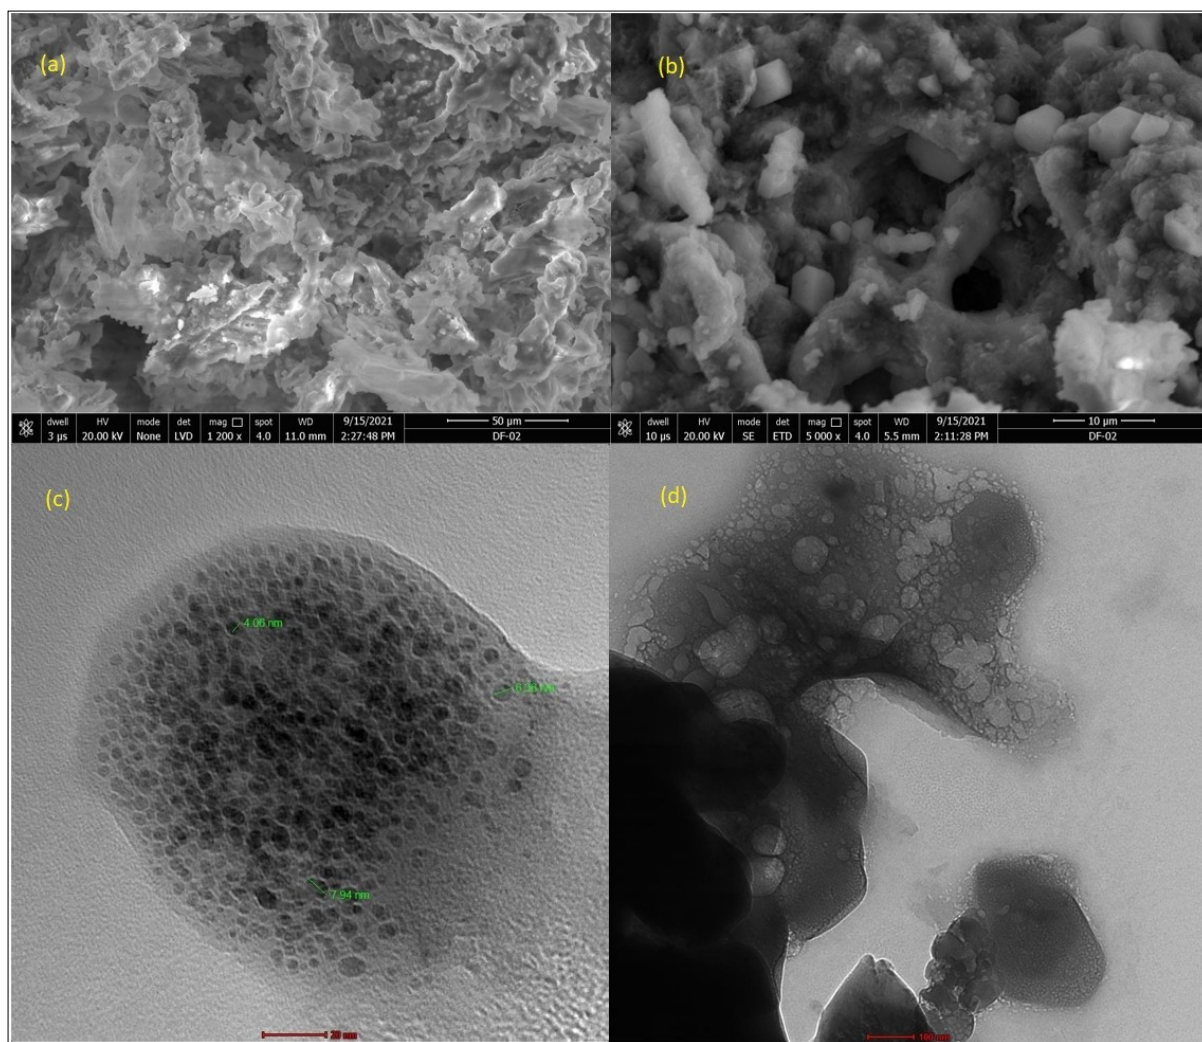

**Figure S3:** (a) and (b) SEM scanning of DFPA; (c) and (d) TEM scanning of DFPA

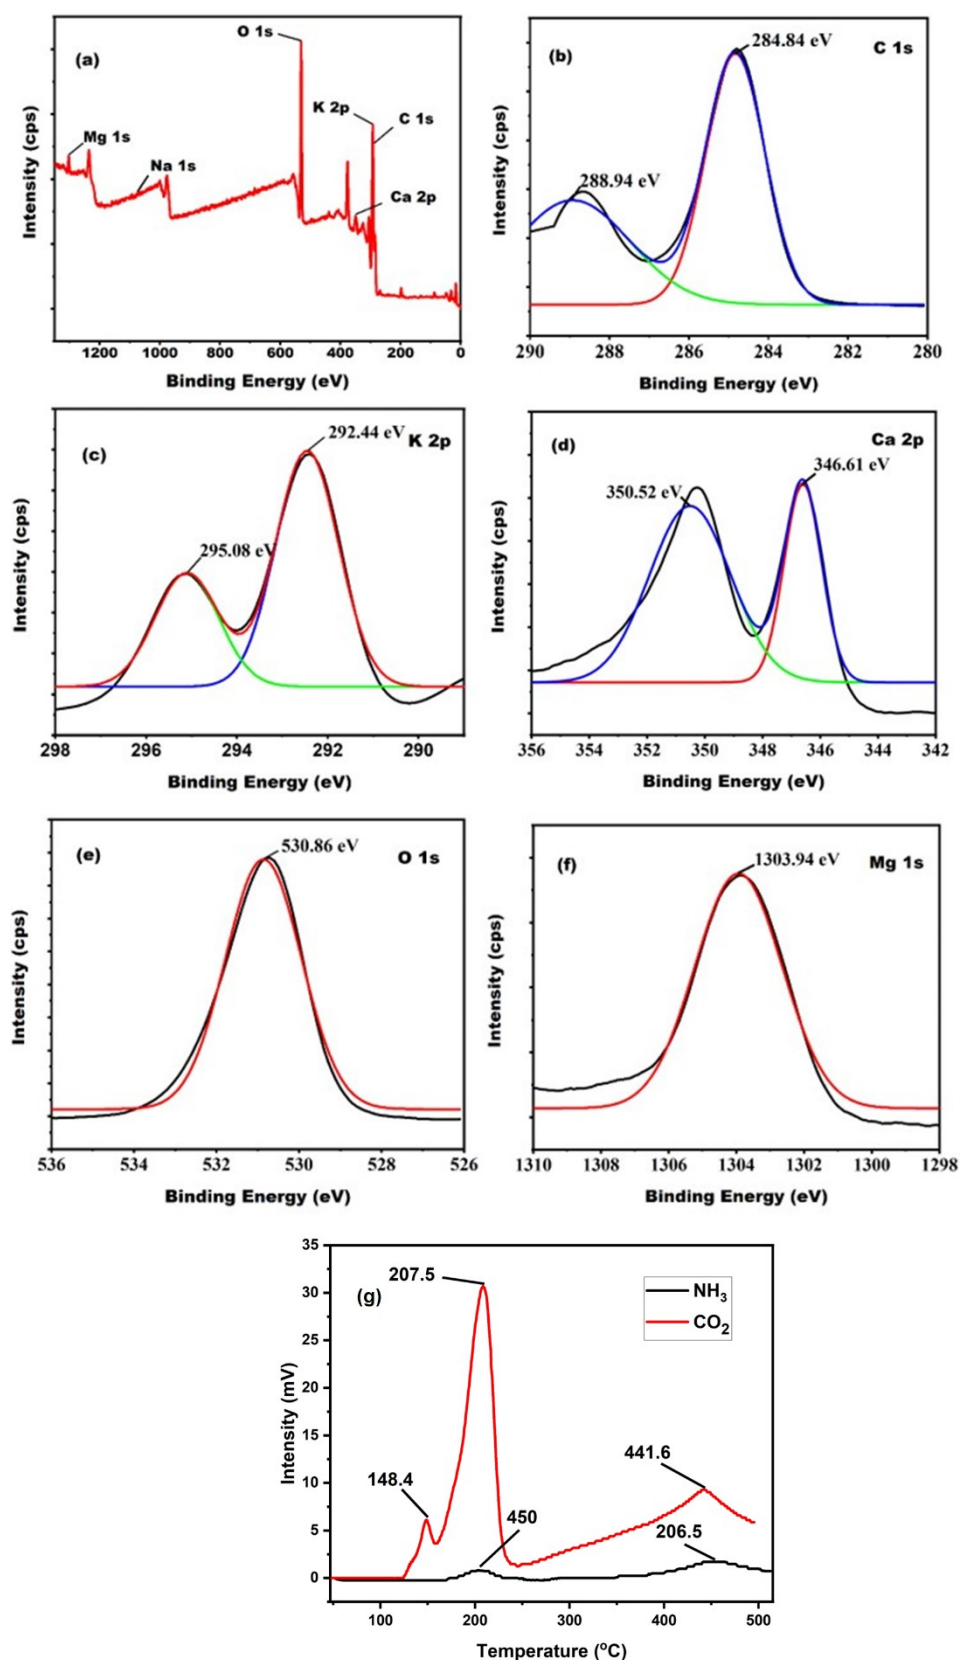

**Figure S4:** (a) XPS Full survey spectrum, (b) C 1s spectra, (c) K 2p spectra, (d) Ca 2p spectra, (e) O 1s spectra, (f) Mg 1s spectra, and (g) Temperature programmed desorption ( $\text{NH}_3$  and  $\text{CO}_2$ ).

### Pressure Calculation using NIST Antoine equation[10,11]

$$\log_{10} P = A - \frac{B}{T + C}$$

Where P is Pressure in bar, T is absolute Temperature (477.15 K), and A, B, and C are specific constants, and their corresponding value is given by NIST.[12] For methanol in the range 353-512 K, A = 5.15853, B = 1569.613, and C = -34.846. Thus, P = 40.72 bar = 4.072 Mpa.

### NMR data of Michael adducts:

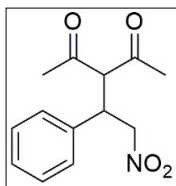

**(3-(2-nitro-1-phenylethyl)pentane-2,4-dione, 3aa):**  $^1\text{H}$  NMR (400 MHz,  $\text{CDCl}_3$ ):  $\delta$  7.38-7.10 (m, 5H), 4.60-4.52 (m, 2H), 4.31-4.14 (m, 2H), 2.20 (s, 3H), 1.86 (s, 3H) ppm.  $^{13}\text{C}$  NMR (100 MHz,  $\text{CDCl}_3$ ):  $\delta$  201.84, 201.13, 136.02, 129.33, 128.55, 127.96, 78.18, 42.81, 30.46, 29.63 ppm.

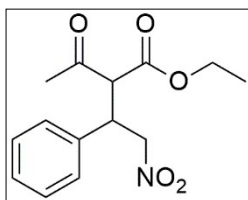

**(Ethyl 2-acetyl-4-nitro-3-phenylbutanoate, 3ba):**  $^1\text{H}$  NMR (400 MHz,  $\text{CDCl}_3$ ):  $\delta$  7.32-7.19 (m, 5H), 4.85-4.74 (m, 2H), 4.26-4.17 (m, 1H), 4.12 (d, 0.87H,  $J$  = 8 Hz), 4.03 (d, 0.22H,  $J$  = 8 Hz), 3.96 (q, 1H,  $J$  = 8 Hz), 2.30-2.05 (s, 3H), 1.27 (t, 0.71H,  $J$  = 8 Hz), 1.00 (t, 2.72H,  $J$  = 8 Hz) ppm.  $^{13}\text{C}$  NMR (100 MHz,  $\text{CDCl}_3$ ):  $\delta$  201.18, 200.37, 167.55, 166.88, 136.45, 129.41, 129.17, 128.95, 128.37, 128.29, 128.00, 127.92, 77.90, 77.80, 62.23, 62.00, 61.97, 61.69, 42.57, 42.32, 30.30, 30.10, 13.99, 13.68 ppm.

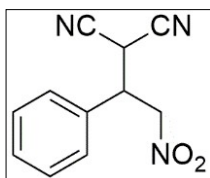

**(2-(2-nitro-1-phenylethyl)malononitrile, 3ca):**  $^1\text{H}$  NMR (400 MHz,  $\text{CDCl}_3$ ):  $\delta$  7.51-7.24 (m, 5H), 5.01-4.88 (m, 2H), 4.45 (d, 1H,  $J$  = 8 Hz), 4.14-4.09 (m, 1H) ppm.  $^{13}\text{C}$  NMR (100 MHz,  $\text{CDCl}_3$ ):  $\delta$  132.08, 130.30, 129.87, 127.82, 110.87, 110.76, 75.08, 43.47, 27.61 ppm.



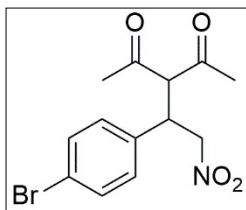

**(3-(1-(4-bromophenyl)-2-nitroethyl)pentane-2,4-dione, 3ab):**  $^1\text{H}$  NMR (400 MHz,  $\text{CDCl}_3$ ):  $\delta$  7.41 (d, 2H,  $J = 8$  Hz), 7.04 (d, 2H,  $J = 8$  Hz), 4.55 (d, 2H,  $J = 8$  Hz), 4.27 (d, 1H,  $J = 8$  Hz), 4.17-4.12 (m, 1H), 2.23 (s, 3H), 1.92 (s, 3H) ppm.  $^{13}\text{C}$  NMR (100 MHz,  $\text{CDCl}_3$ ):  $\delta$  201.44, 200.67, 135.15, 132.52, 129.68, 122.67, 77.85, 70.41, 42.23, 30.48, 29.76 ppm.

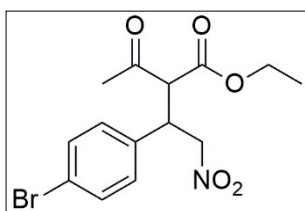

**(Ethyl 2-acetyl-3-(4-bromophenyl)-4-nitrobutanoate, 3bb):**  $^1\text{H}$  NMR (400 MHz,  $\text{CDCl}_3$ ):  $\delta$  7.44-7.07 (m, 4H), 4.85-4.66 (m, 2H), 4.24-4.13 (m, 2H), 4.10-4.05 (m, 1H), 4.00-3.94 (m, 1H), 2.28-2.07 (s, 3H), 1.26 (t, 1.56H,  $J = 4$  Hz), 1.03 (t, 1.58H,  $J = 4$  Hz) ppm.  $^{13}\text{C}$  NMR (100 MHz,  $\text{CDCl}_3$ ):  $\delta$  200.85, 200.03, 167.30, 166.67, 135.60, 135.57, 132.31, 132.11, 129.77, 129.67, 122.41, 122.35, 77.62, 77.46, 62.40, 62.18, 61.71, 61.49, 41.91, 41.74, 30.33, 30.06, 13.99, 13.75 ppm.

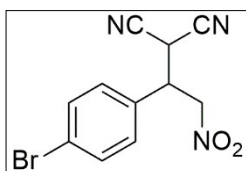

**(2-(1-(4-bromophenyl)-2-nitroethyl)malononitrile, 3cb):**  $^1\text{H}$  NMR (400 MHz,  $\text{CDCl}_3$ ):  $\delta$  7.27-7.13 (m, 4H), 4.82-4.72 (m, 2H), 4.45 (d, 1H,  $J = 8$  Hz), 4.34-4.27 (m, 1H) ppm.  $^{13}\text{C}$  NMR (100 MHz,  $\text{CDCl}_3$ ):  $\delta$  133.43, 132.82, 129.11, 123.32, 110.48, 110.37, 76.45, 41.22, 27.41 ppm.

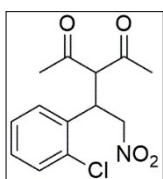



**(3-(1-(2-chlorophenyl)-2-nitroethyl)pentane-2,4-dione, 3ac):**  $^1\text{H}$  NMR (400 MHz,  $\text{CDCl}_3$ ):  $\delta$  7.45-7.15 (m, 4H), 4.86-4.73 (m, 2H), 4.69-4.59 (m, 2H), 2.28 (s, 3H), 2.04 (s, 3H) ppm.  $^{13}\text{C}$  NMR (100 MHz,  $\text{CDCl}_3$ ):  $\delta$  201.91, 200.93, 133.78, 133.47, 130.65, 129.72, 129.01, 127.66, 76.21, 68.90, 38.88, 30.91, 28.64 ppm.

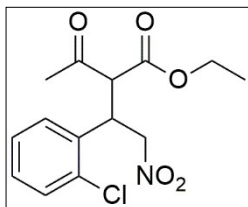

**(Ethyl 2-acetyl-3-(2-chlorophenyl)-4-nitrobutanoate, 3bc):**  $^1\text{H}$  NMR (400 MHz,  $\text{CDCl}_3$ ):  $\delta$  7.42-7.17 (m, 4H), 5.11-5.06 (m, 0.42H), 4.94-4.87 (m, 0.84H), 4.78-4.68 (m, 1H), 4.42 (d, 1H,  $J = 8$  Hz), 4.25-4.18 (m, 1H), 4.05-3.97 (m, 1H), 2.33-2.21 (s, 3H), 1.26-1.01 (m, 3H) ppm.  $^{13}\text{C}$  NMR (100 MHz,  $\text{CDCl}_3$ ):  $\delta$  201.07, 200.34, 167.53, 166.64, 134.07, 134.00, 133.95, 133.86, 130.60, 130.43, 129.49, 129.42, 128.77, 128.63, 127.43, 127.31, 76.18, 75.57, 62.20, 62.10, 60.17, 60.09, 38.72, 30.42, 29.78, 13.97, 13.66 ppm.

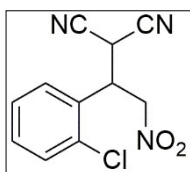

**(2-(1-(2-chlorophenyl)-2-nitroethyl)malononitrile, 3cc):**  $^1\text{H}$  NMR (400 MHz,  $\text{CDCl}_3$ ):  $\delta$  7.61-7.26 (m, 4H), 5.02-4.99 (m, 2H), 4.81-4.75 (m, 1H), 4.55 (d, 1H,  $J = 8$  Hz) ppm.  $^{13}\text{C}$  NMR (100 MHz,  $\text{CDCl}_3$ ):  $\delta$  134.14, 131.41, 131.12, 129.54, 128.31, 127.76, 110.46, 110.14, 73.86, 39.75, 25.86 ppm.

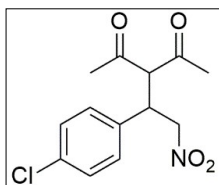

**(3-(1-(4-chlorophenyl)-2-nitroethyl)pentane-2,4-dione, 3ad):** R-4:  $^1\text{H}$  NMR (400 MHz,  $\text{CDCl}_3$ ):  $\delta$  7.39 (d, 2H,  $J = 8$  Hz), 7.01 (d, 2H,  $J = 8$  Hz), 4.54 (d, 1H,  $J = 8$  Hz), 4.26 (d, 1H,  $J = 8$  Hz), 4.17-4.13 (m, 1H), 2.21 (s, 3H), 1.90 (s, 3H) ppm.  $^{13}\text{C}$  NMR (100 MHz,  $\text{CDCl}_3$ ):  $\delta$  201.42, 200.65, 135.14, 132.51, 129.67, 122.65, 77.84, 70.40, 42.21, 30.48, 29.77 ppm.

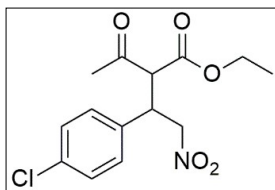

**(Ethyl 2-acetyl-3-(4-chlorophenyl)-4-nitrobutanoate, 3bd):**  $^1\text{H}$  NMR (400 MHz,  $\text{CDCl}_3$ ):  $\delta$  7.44 (d, 2H,  $J = 8$  Hz), 7.10 (d, 2H,  $J = 8$  Hz), 4.88-4.71 (m, 2H), 4.26-3.97 (m, 4H), 2.31 (s, 1.69H), 2.09 (s, 1.49H), 1.28 (t, 1.91H,  $J = 8$  Hz), 1.05 (t, 1.36H,  $J = 8$  Hz) ppm.  $^{13}\text{C}$  NMR (100 MHz,  $\text{CDCl}_3$ ):  $\delta$  200.83, 199.96, 167.28, 166.65, 135.53, 132.32, 132.13, 129.72, 129.63, 122.44, 122.37, 77.60, 77.44, 62.39, 62.17, 61.69, 61.50, 41.89, 41.73, 30.32, 30.07, 13.99, 13.67 ppm.

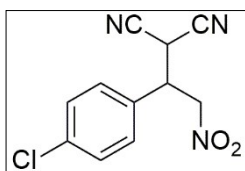

**(2-(1-(4-chlorophenyl)-2-nitroethyl)malononitrile, 3cd):**  $^1\text{H}$  NMR (400 MHz,  $\text{CDCl}_3$ ):  $\delta$  7.52 (d, 2H,  $J = 8$  Hz), 7.12 (d, 2H,  $J = 8$  Hz), 4.80-4.70 (m, 2H), 4.43 (d,  $J = 4$  Hz), 4.33-4.26 (m, 1H) ppm.  $^{13}\text{C}$  NMR (100 MHz,  $\text{CDCl}_3$ ):  $\delta$  133.13, 132.85, 129.06, 123.37, 76.43, 41.25, 27.40 ppm.

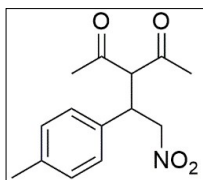

**(3-(2-nitro-1-(p-tolyl)ethyl)pentane-2,4-dione, 3ae):**  $^1\text{H}$  NMR (400 MHz,  $\text{CDCl}_3$ ):  $\delta$  7.13-7.06 (m, 4H), 4.61-4.20 (m, 4H), 2.30 (s, 3H), 2.28 (s, 3H), 1.94 (s, 3H) ppm.  $^{13}\text{C}$  NMR (100 MHz,  $\text{CDCl}_3$ ):  $\delta$  201.94, 201.22, 138.34, 132.85, 129.99, 127.80, 78.36, 70.78, 42.47, 30.42, 29.52, 21.05 ppm.

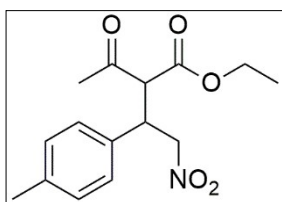

**(Ethyl 2-acetyl-4-nitro-3-(p-tolyl)butanoate, 3be):**  $^1\text{H}$  NMR (400 MHz,  $\text{CDCl}_3$ ):  $\delta$  7.12-7.06 (m, 4H), 4.85-4.71 (m, 2H), 4.25-3.94 (m, 4H), 2.29-2.03 (s, 6H), 1.27 (t, 1.60H,  $J = 4$  Hz),

1.02 (t, 1.42H,  $J = 4$  Hz) ppm.  $^{13}\text{C}$  NMR (100 MHz,  $\text{CDCl}_3$ ):  $\delta$  201.39, 200.62, 167.64, 166.98, 138.12, 137.99, 133.34, 133.24, 129.83, 129.60, 127.83, 127.77, 78.03, 62.19, 62.08, 61.94, 61.71, 42.31, 42.01, 30.31, 30.09, 21.04, 13.98, 13.69 ppm.

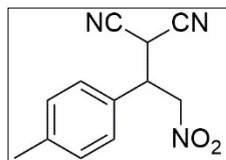

**(2-(2-nitro-1-(p-tolyl)ethyl)malononitrile, 3ce):**  $^1\text{H}$  NMR (400 MHz,  $\text{CDCl}_3$ ):  $\delta$  7.27-7.22 (m, 4H), 4.97-4.85 (m, 2H), 4.42 (d, 1H,  $J = 4$  Hz), 4.30-4.24 (m, 1H), 2.37 (m, 3H) ppm.  $^{13}\text{C}$  NMR (100 MHz,  $\text{CDCl}_3$ ):  $\delta$  139.06, 130.25, 128.92, 127.25, 110.82, 110.69, 75.13, 41.48, 27.68, 21.21 ppm.

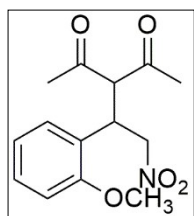

**(3-(1-(2-methoxyphenyl)-2-nitroethyl)pentane-2,4-dione, 3af):**  $^1\text{H}$  NMR (400 MHz,  $\text{CDCl}_3$ ):  $\delta$  7.28-6.86 (m, 4H), 4.81-4.76 (m, 1H), 4.61-4.56 (m, 2H), 4.50-4.45 (m, 1H), 3.87 (s, 3H), 2.25 (s, 3H), 1.93 (s, 3H) ppm.  $^{13}\text{C}$  NMR (100 MHz,  $\text{CDCl}_3$ ):  $\delta$  202.29, 201.68, 157.07, 130.29, 129.75, 123.55, 121.13, 111.28, 76.54, 68.83, 55.44, 39.09, 30.46, 28.94 ppm.

## $^1\text{H}$ and $^{13}\text{C}$ NMR spectra of Michael Addition Products

**Figure S5:**  $^1\text{H}$  and  $^{13}\text{C}$  NMR of **3aa** (3-(2-nitro-1-phenylethyl)pentane-2,4-dione).

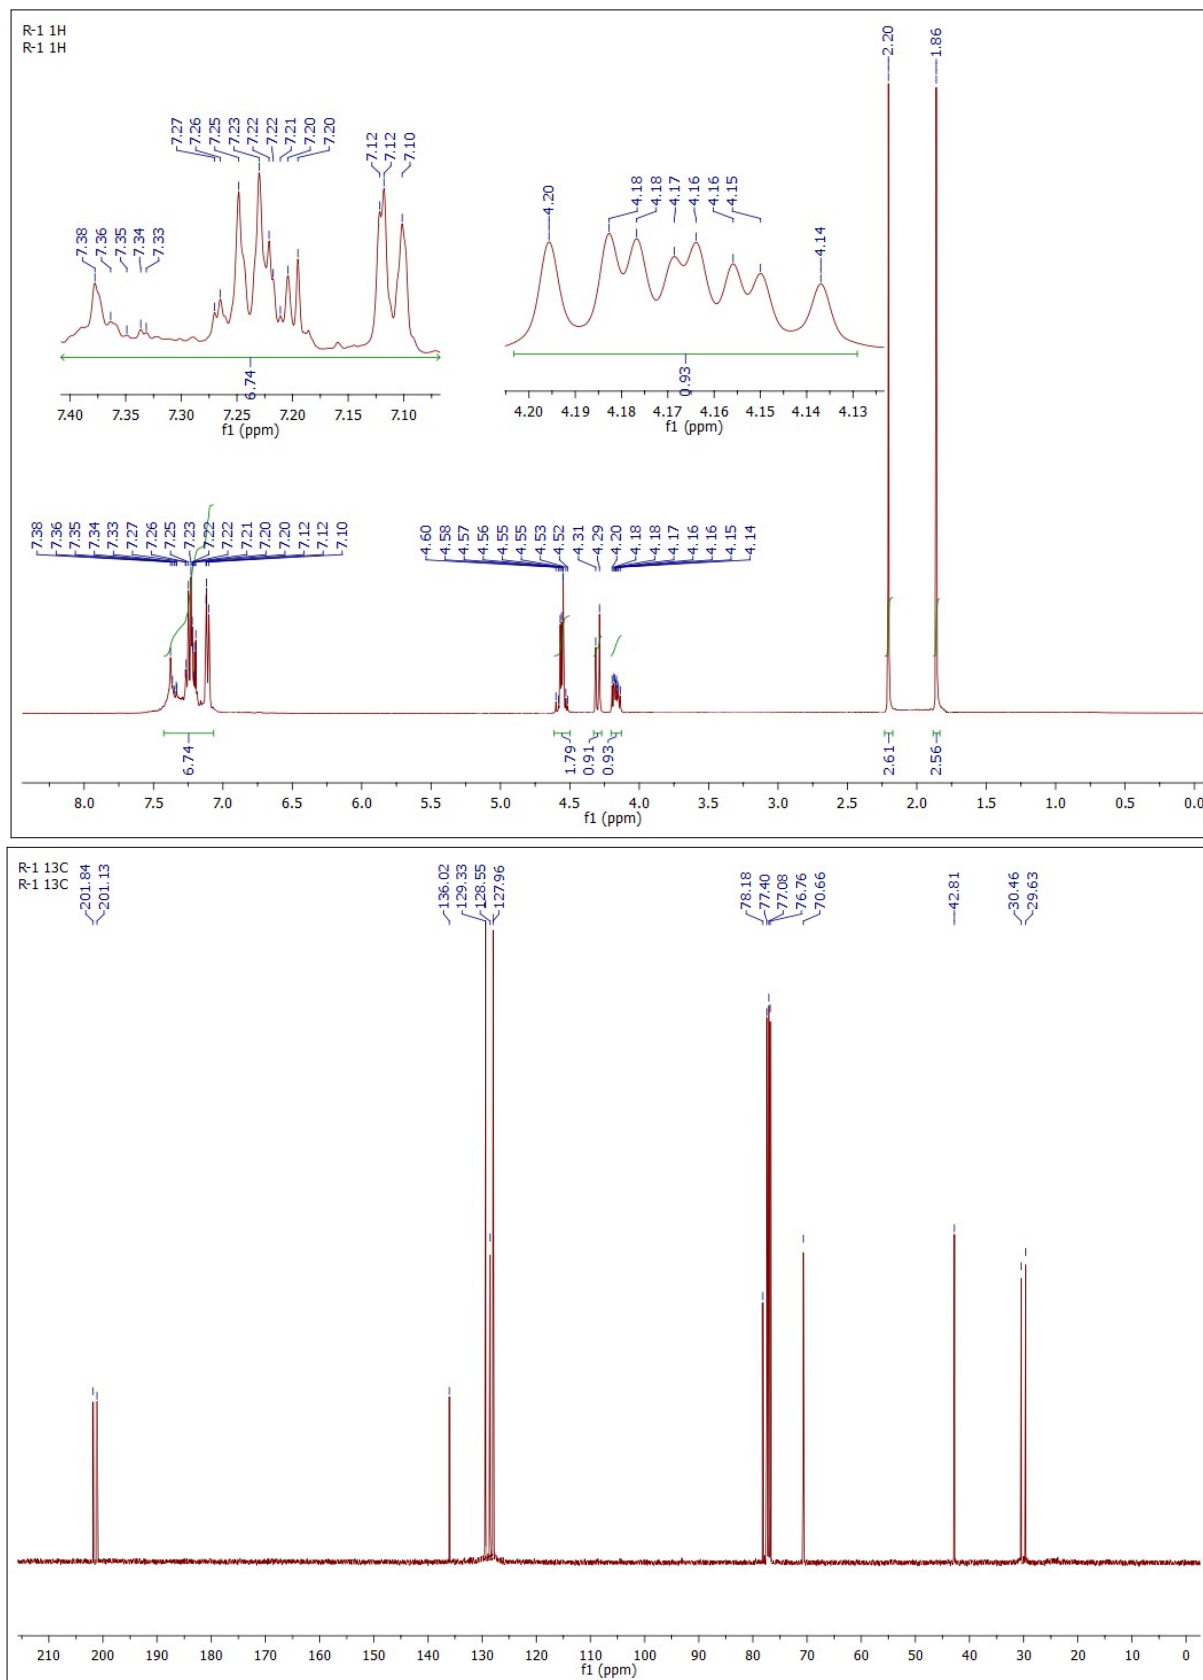

**Figure S6:**  $^1\text{H}$  and  $^{13}\text{C}$  NMR of **3ba** (Ethyl 2-acetyl-4-nitro-3-phenylbutanoate).

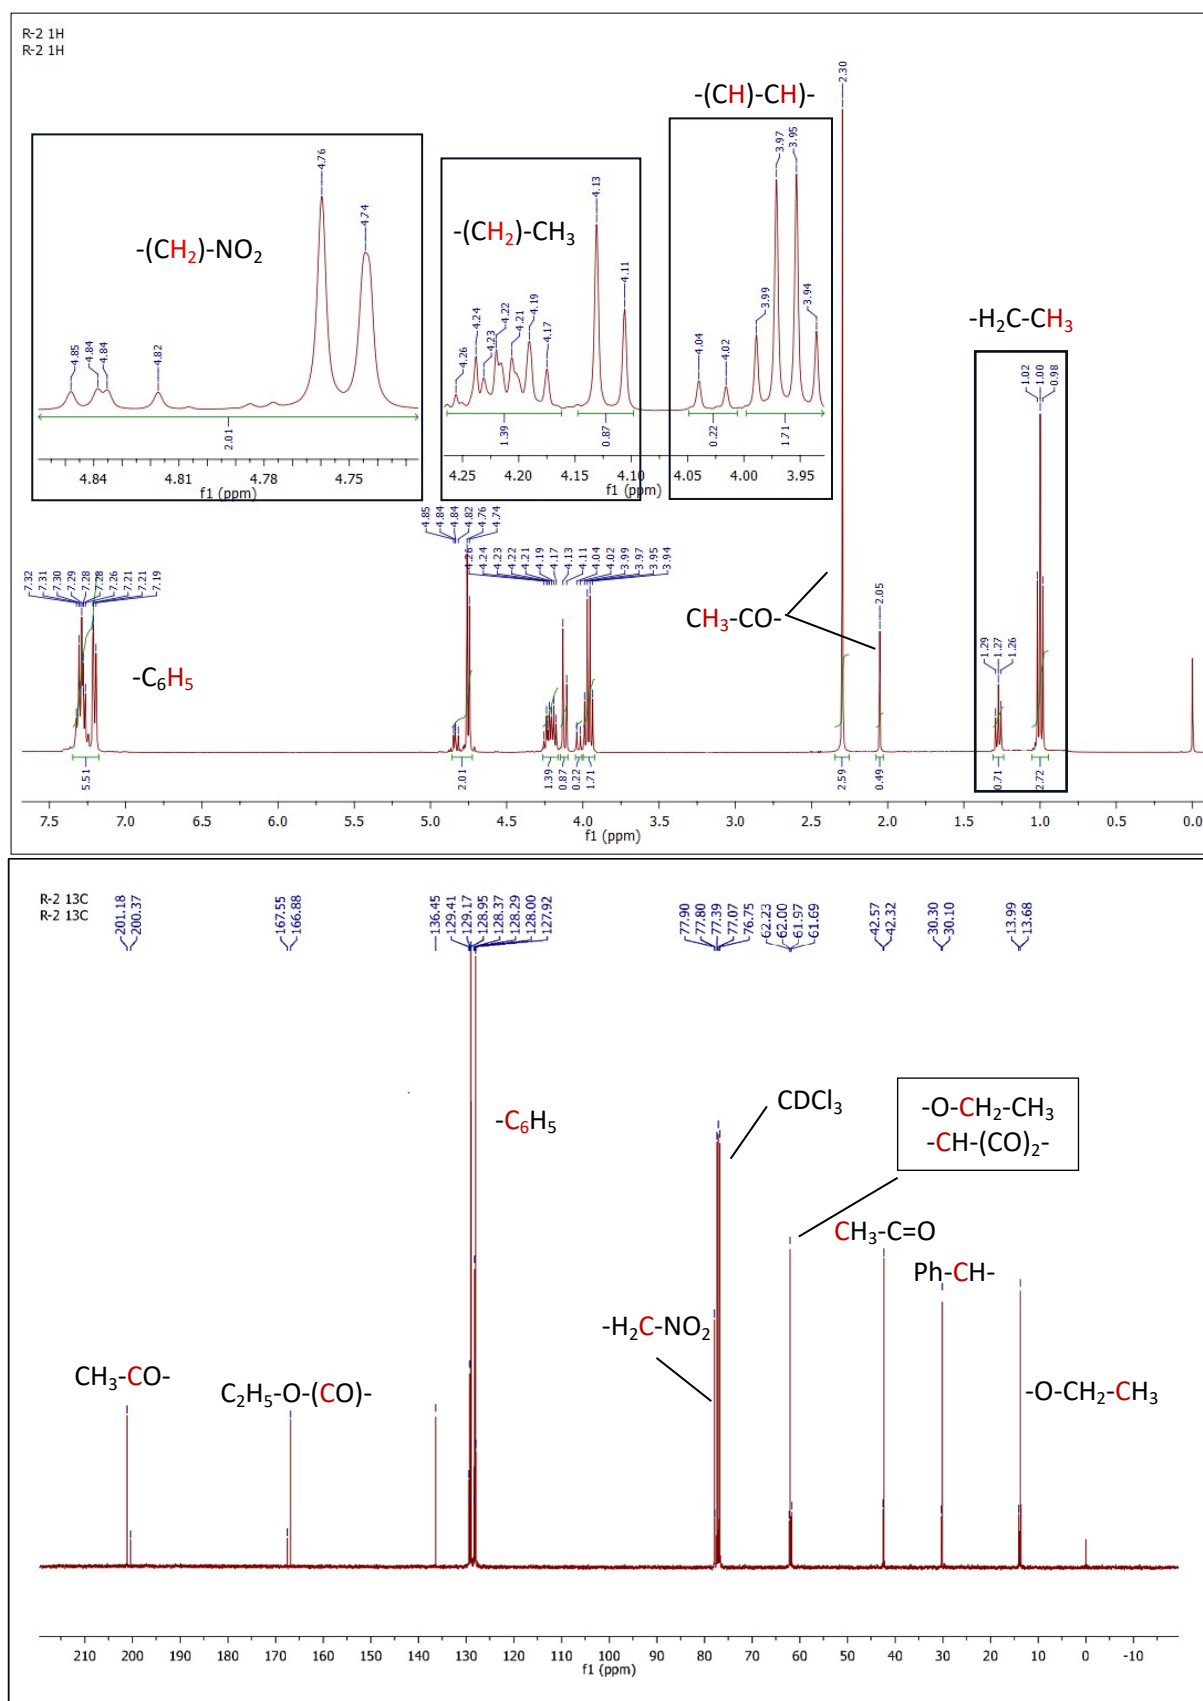

**Figure S7:**  $^1\text{H}$  and  $^{13}\text{C}$  NMR of **3ca** (2-(2-nitro-1-phenylethyl)malononitrile).

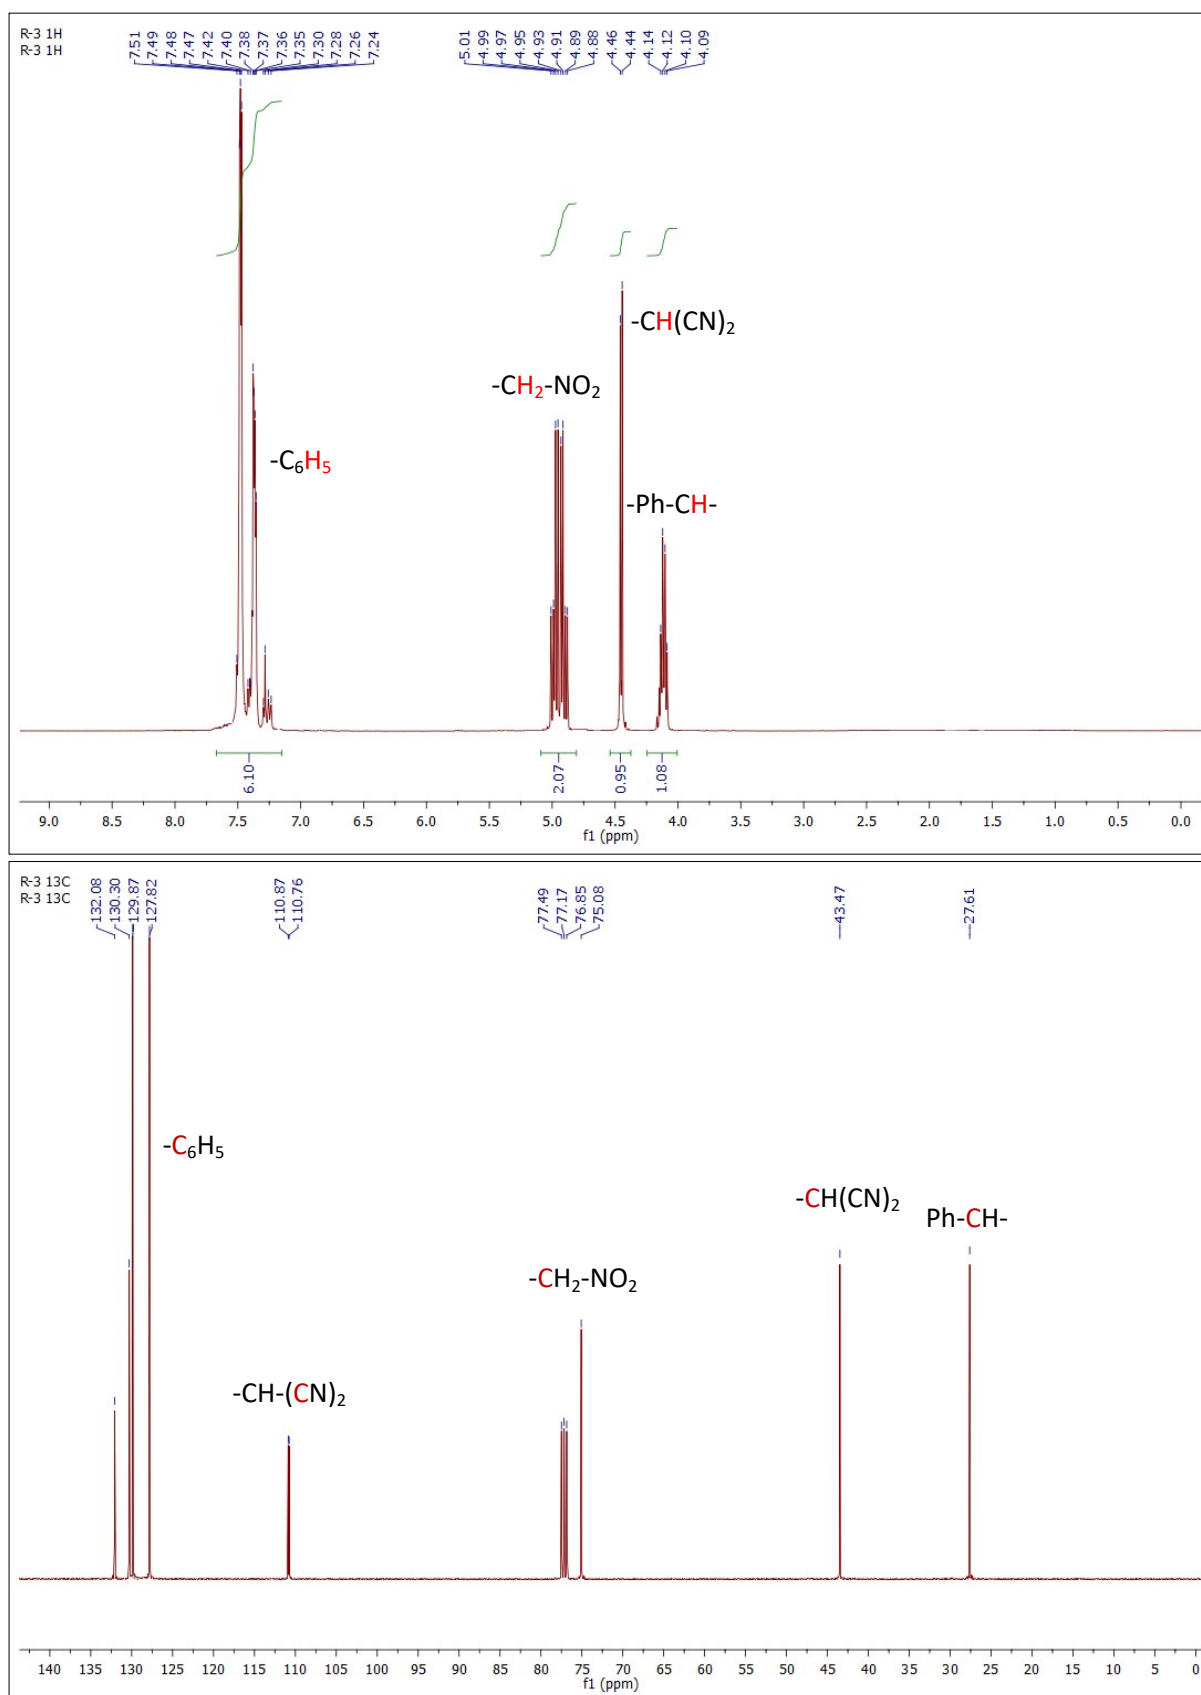

**Figure S8:**  $^1\text{H}$  and  $^{13}\text{C}$  NMR of **3ab** (3-(1-(4-bromophenyl)-2-nitroethyl)pentane-2,4-dione).

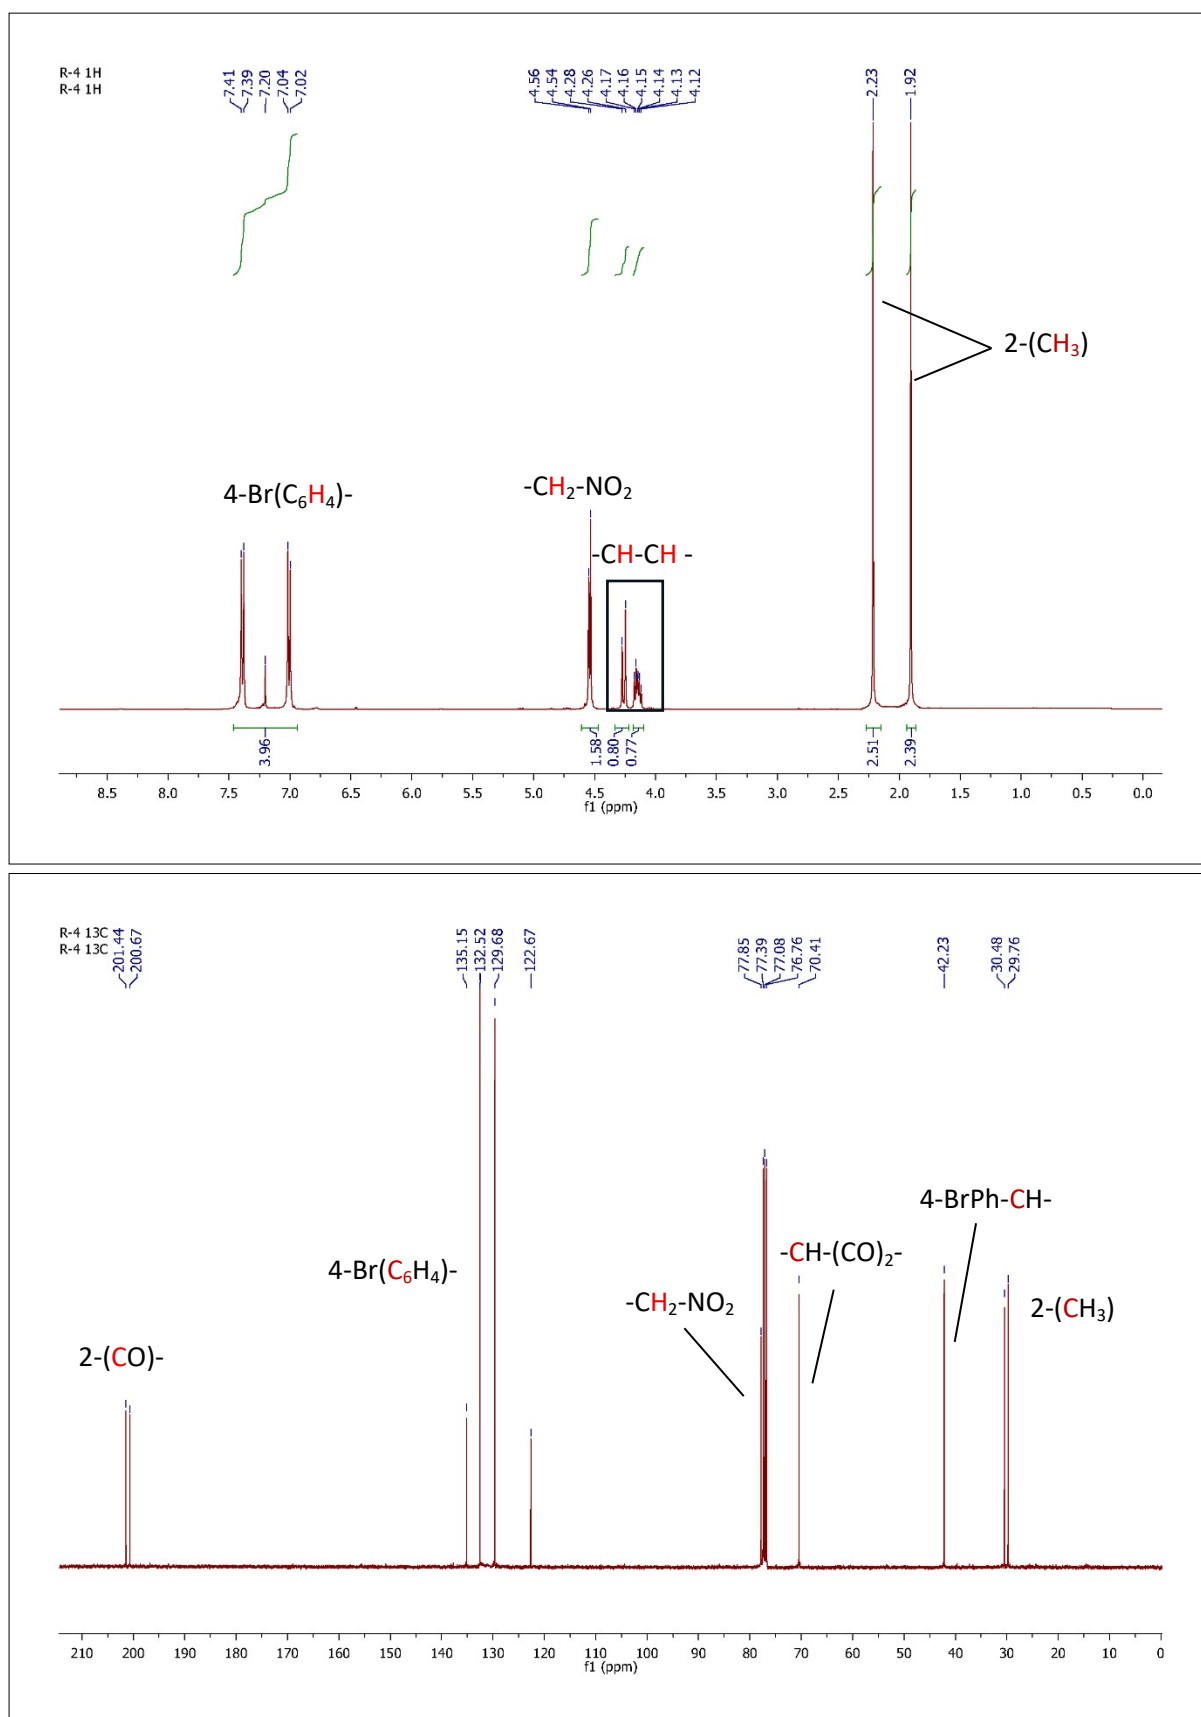



**Figure S9:**  $^1\text{H}$  and  $^{13}\text{C}$  NMR of **3bb** (Ethyl 2-acetyl-3-(4-bromophenyl)-4-nitrobutanoate).

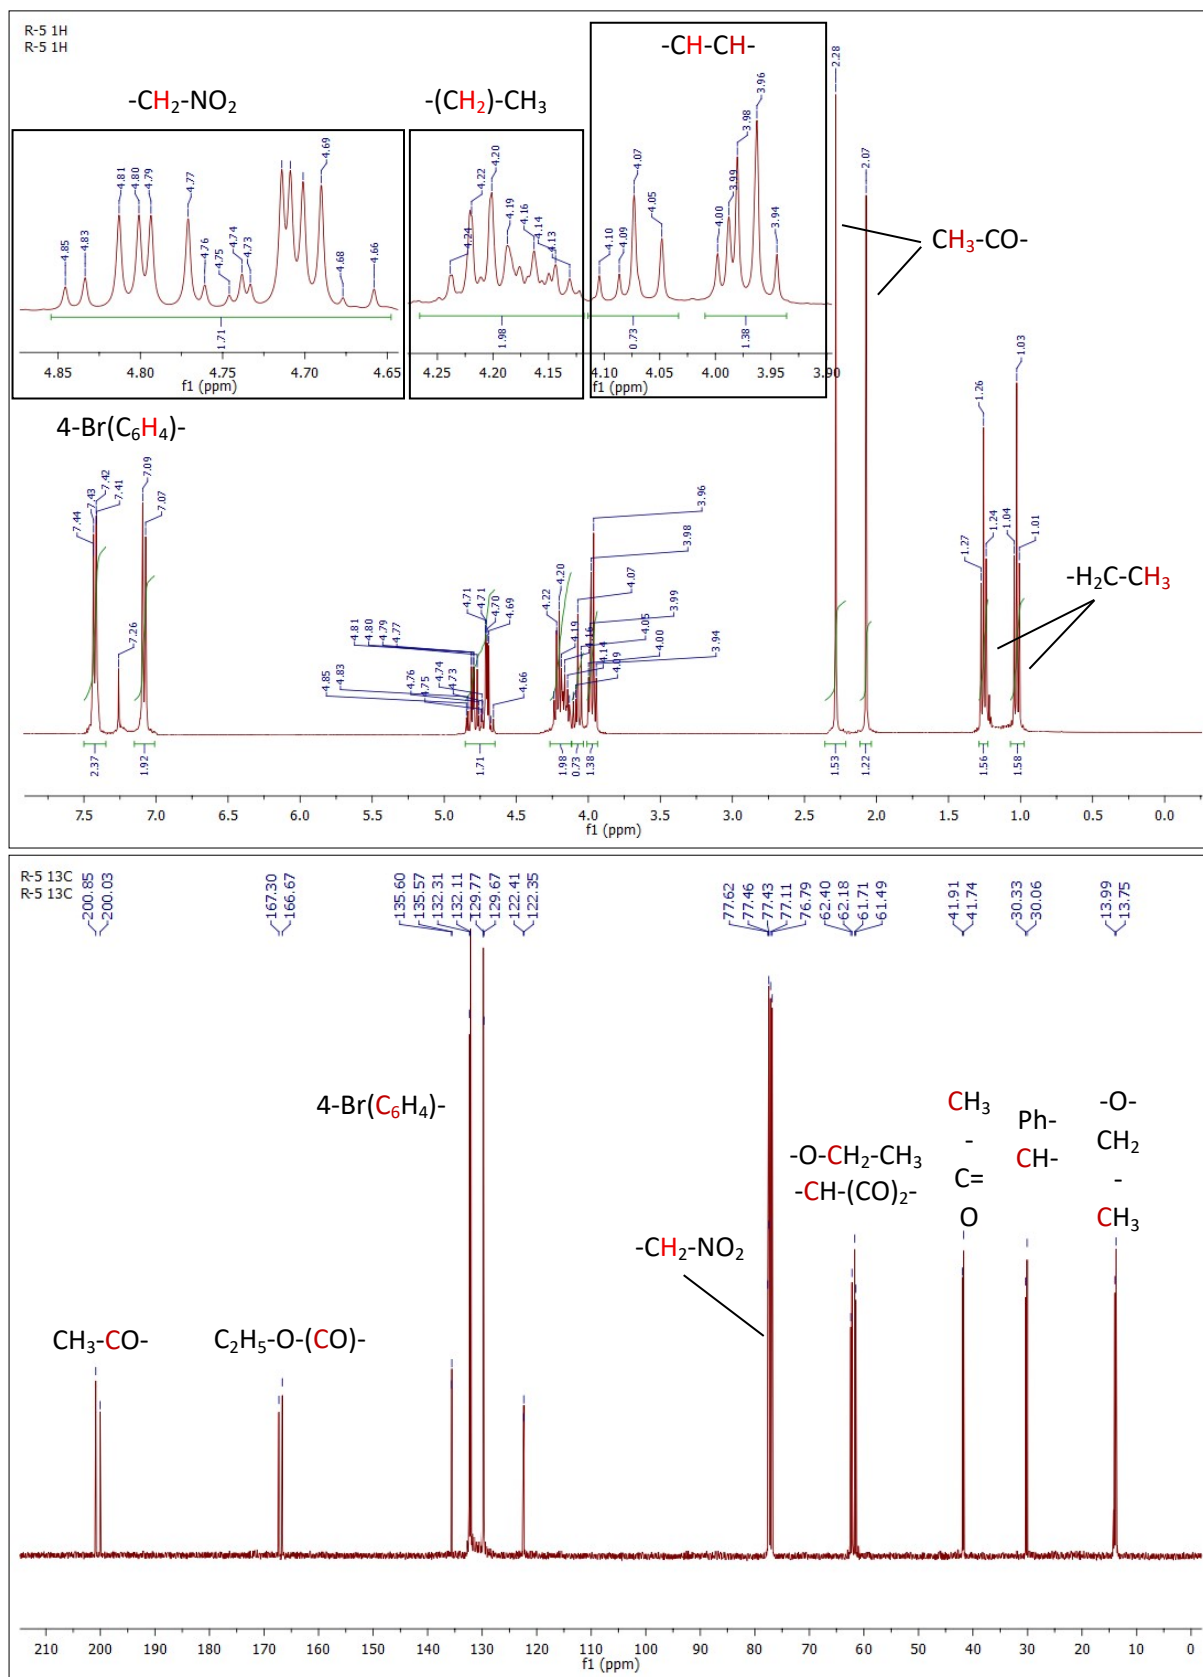

**Figure S10:**  $^1\text{H}$  and  $^{13}\text{C}$  NMR of 3cb (2-(1-(4-bromophenyl)-2-nitroethyl)malononitrile).

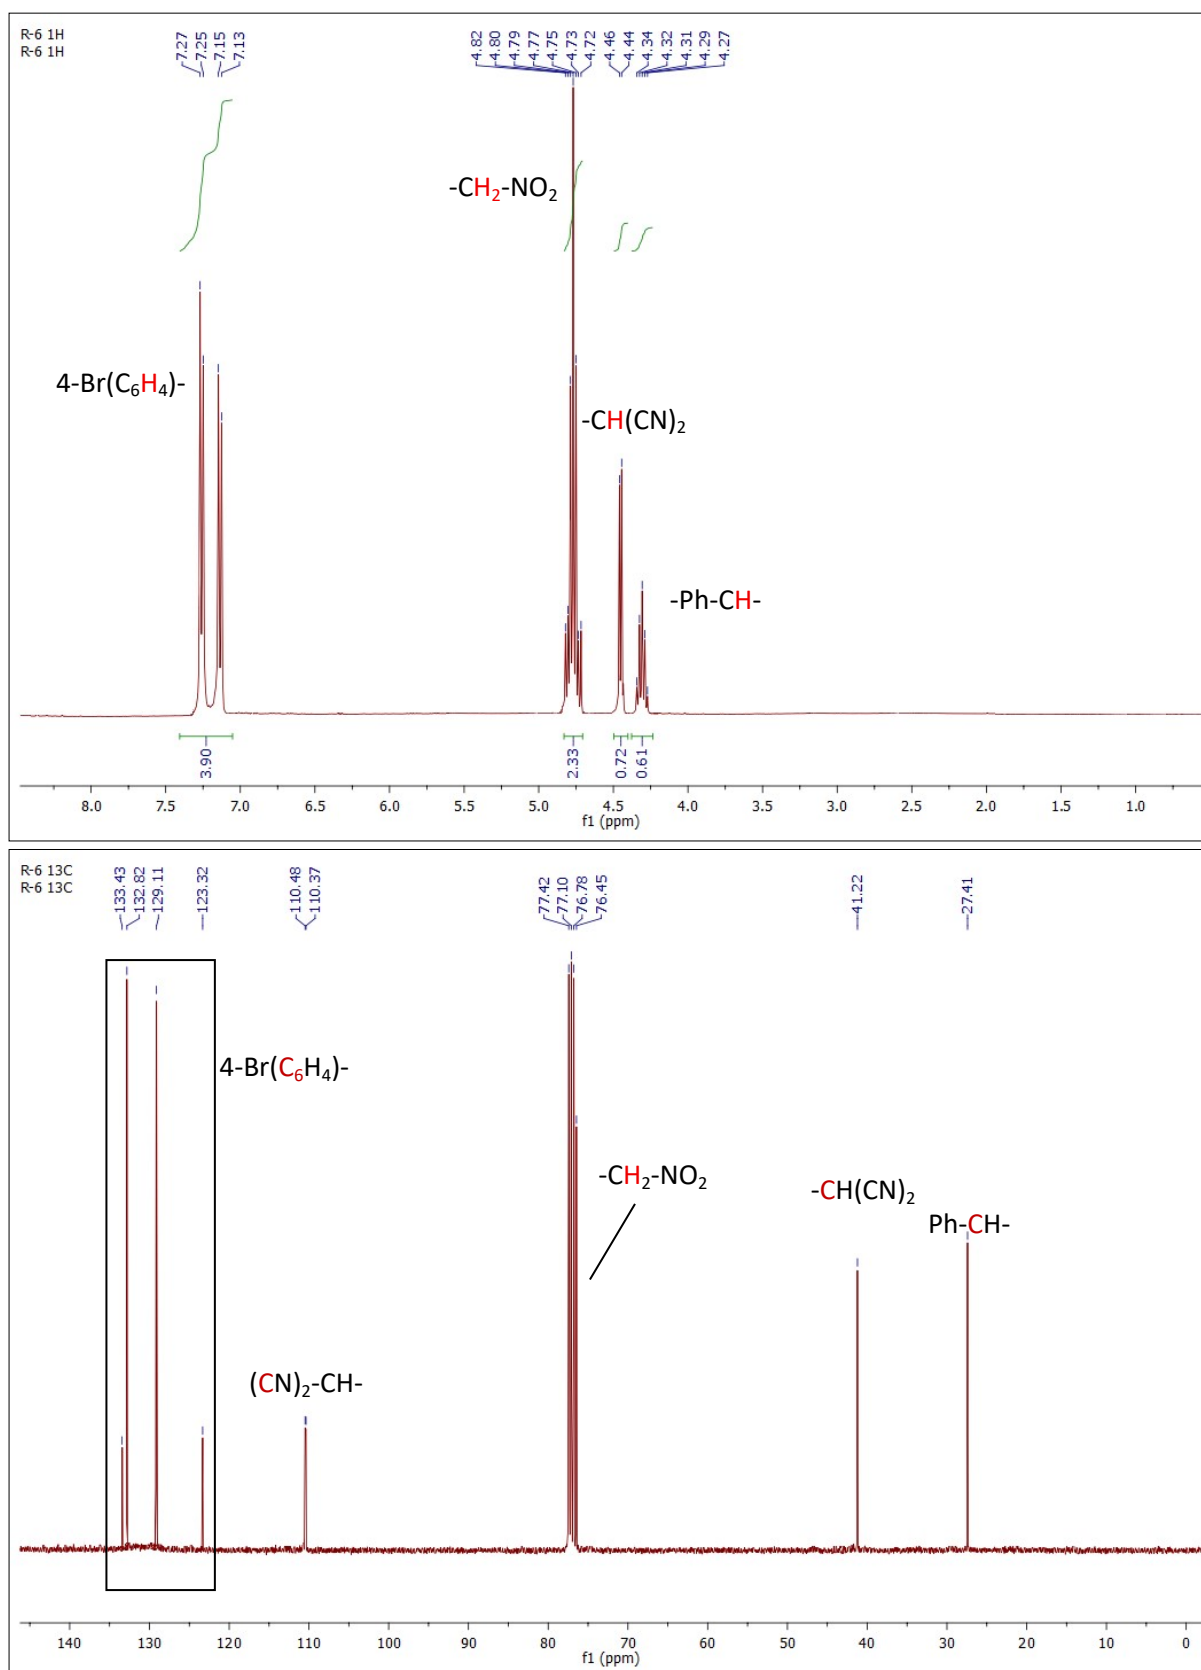

**Figure S11:**  $^1\text{H}$  and  $^{13}\text{C}$  NMR of **3ac** (3-(1-(2-chlorophenyl)-2-nitroethyl)pentane-2,4-dione).

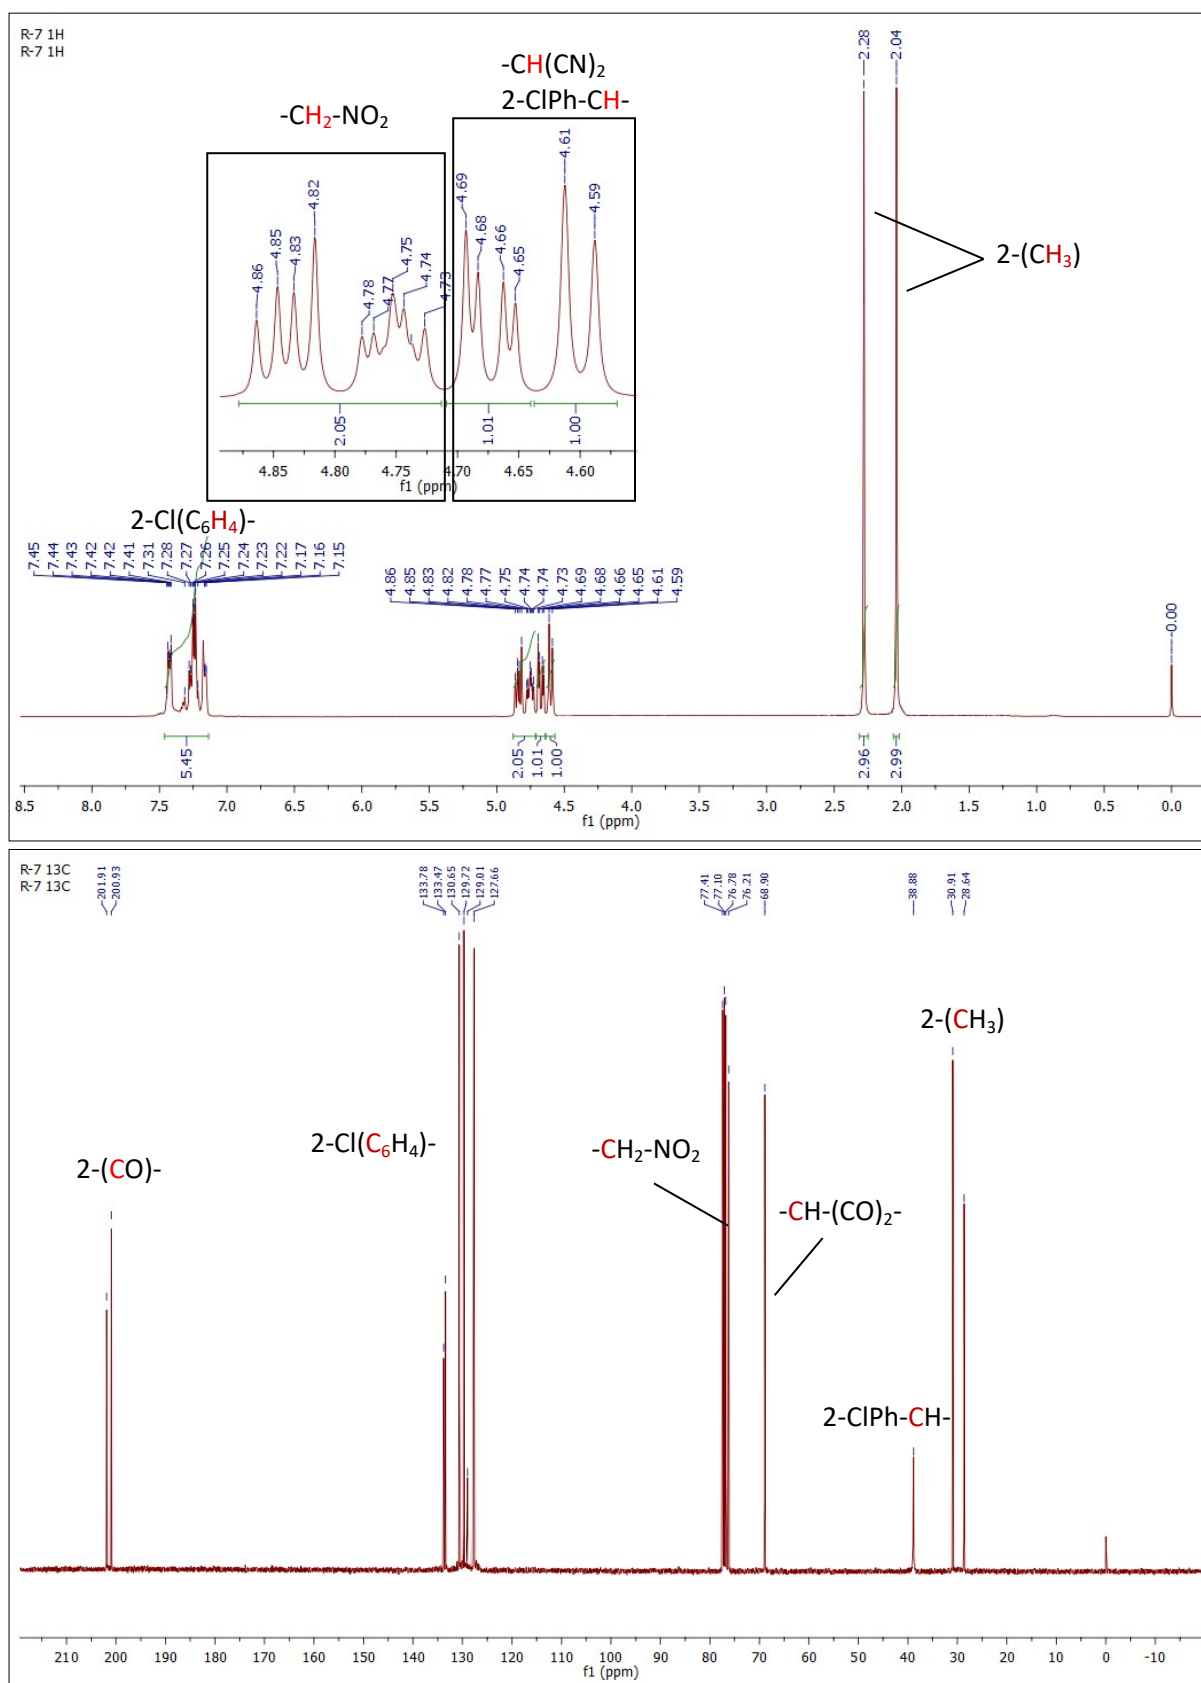

**Figure S12:**  $^1\text{H}$  and  $^{13}\text{C}$  NMR of **3bc** (Ethyl 2-acetyl-3-(2-chlorophenyl)-4-nitrobutanoate).

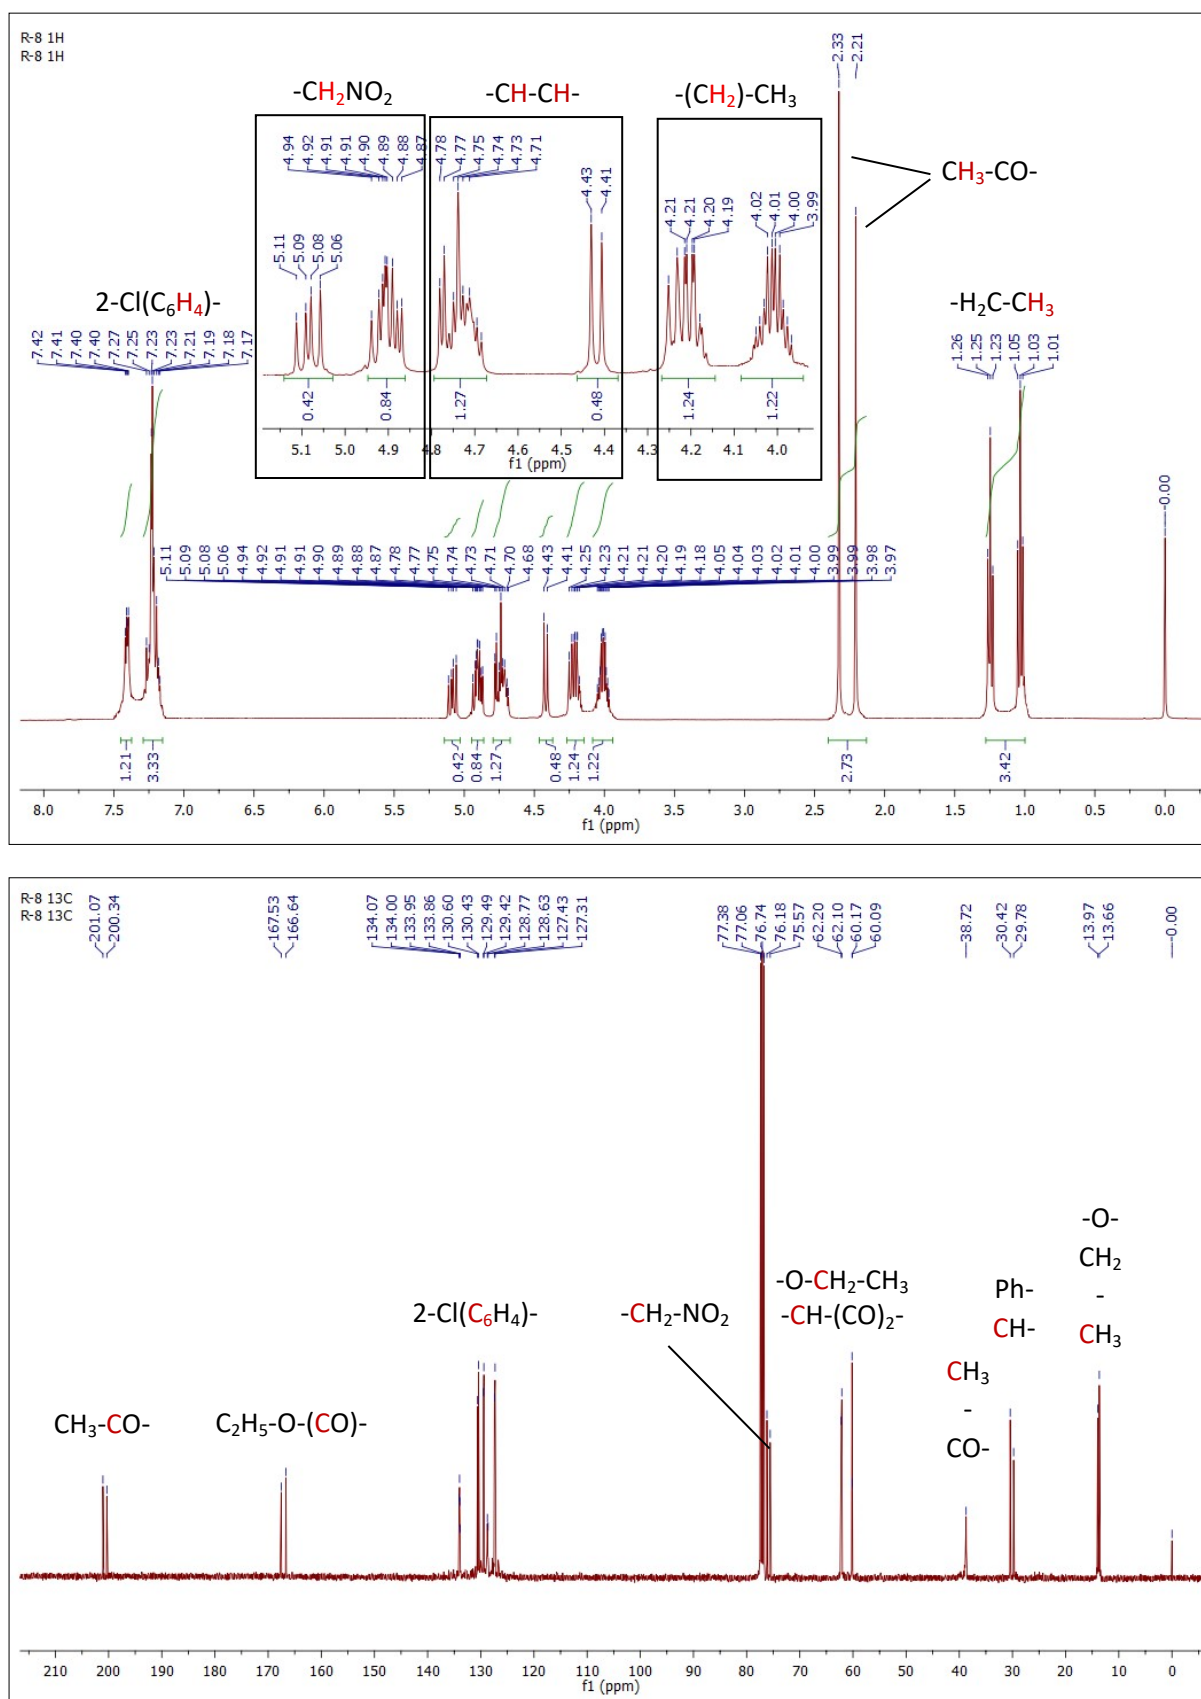

**Figure S13:**  $^1\text{H}$  and  $^{13}\text{C}$  NMR of **3cc** (2-(1-(2-chlorophenyl)-2-nitroethyl)malononitrile).

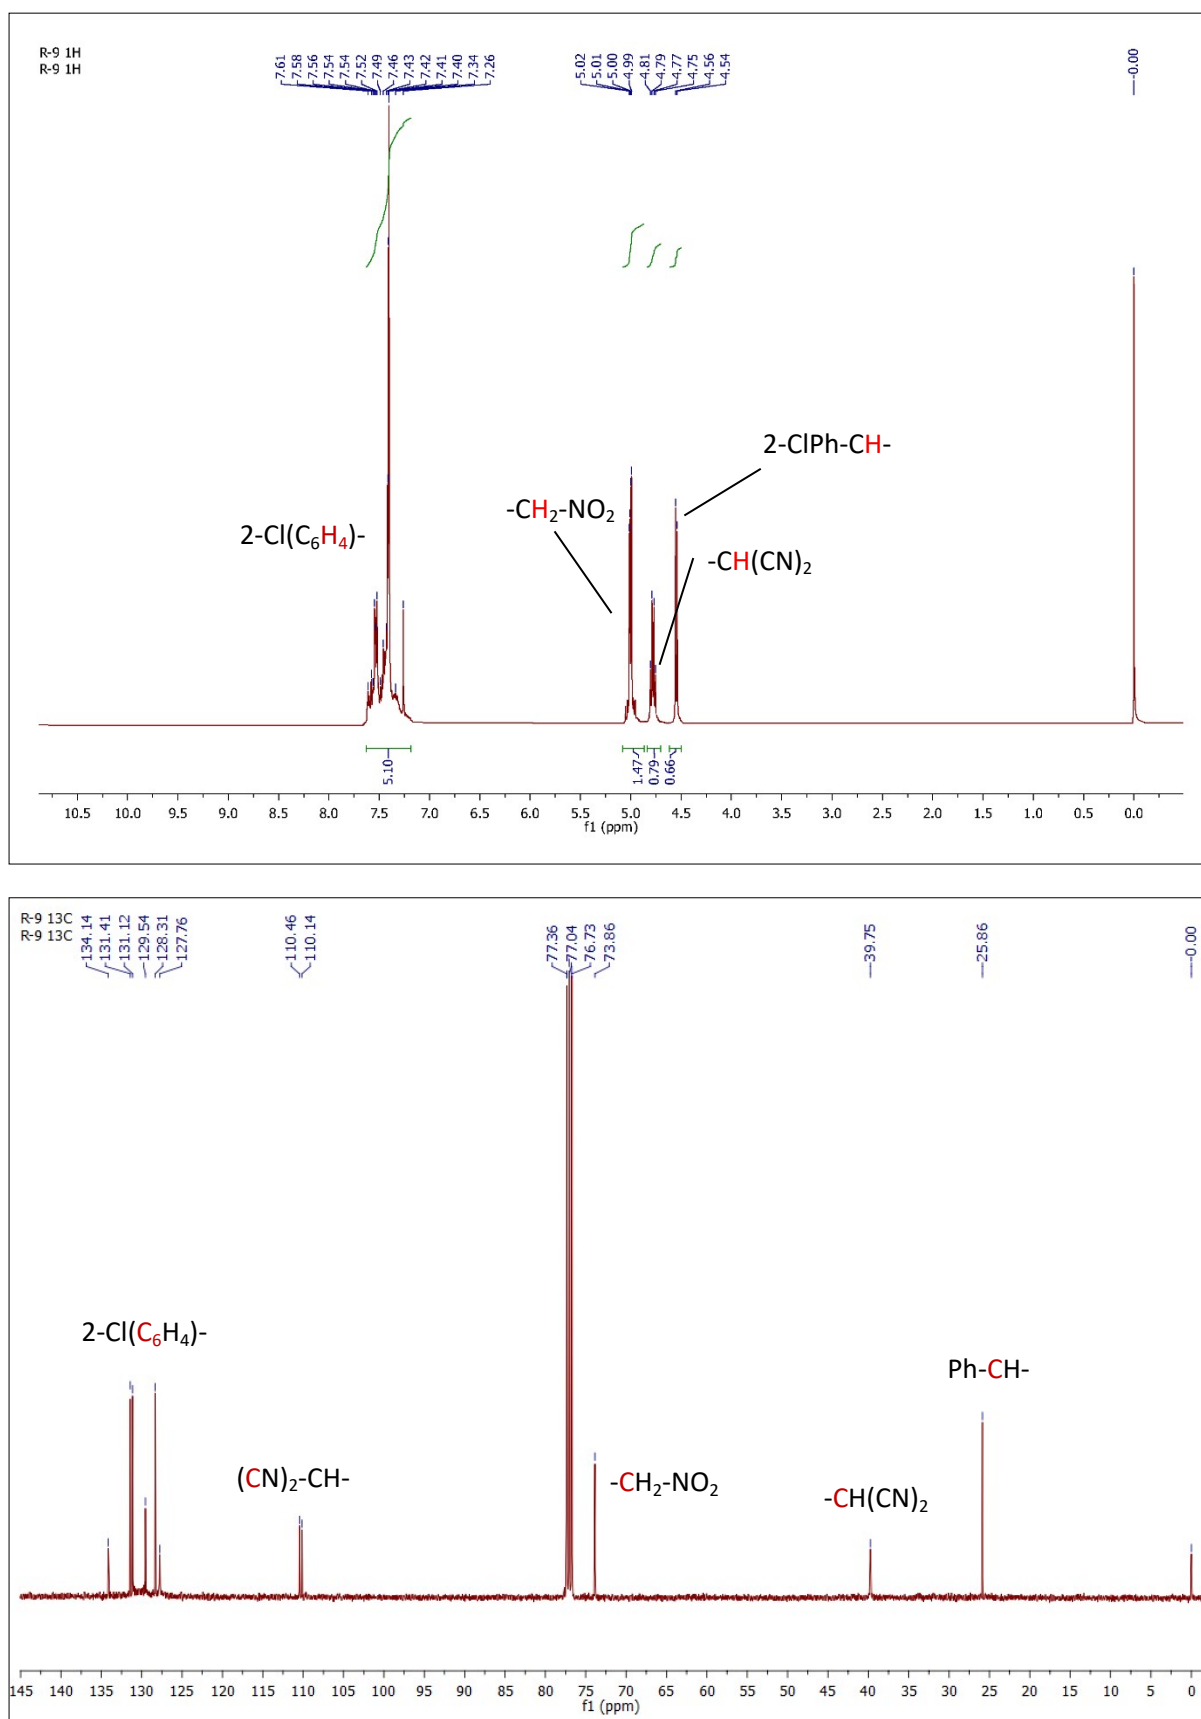

**Figure S14:**  $^1\text{H}$  and  $^{13}\text{C}$  NMR of **3ad** (3-(1-(4-chlorophenyl)-2-nitroethyl)pentane-2,4-dione).

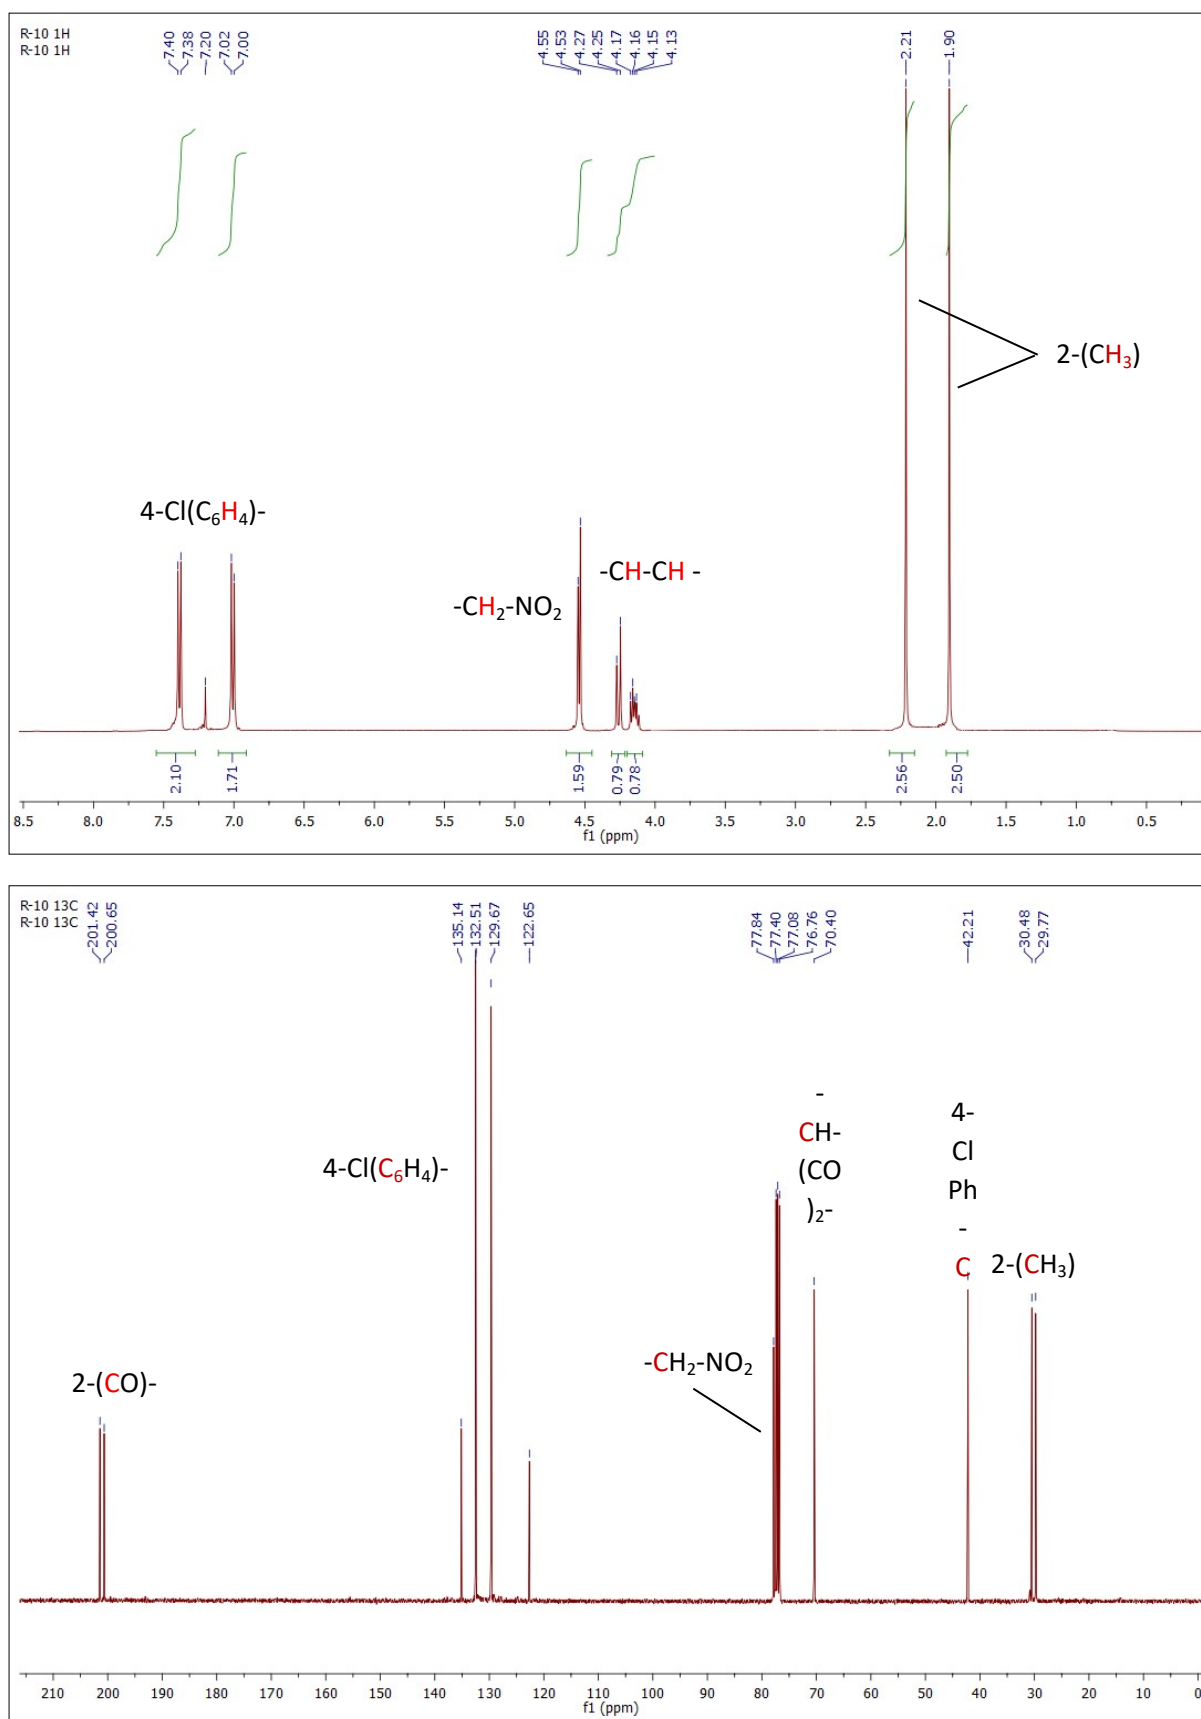

**Figure S15:**  $^1\text{H}$  and  $^{13}\text{C}$  NMR of **3bd** (Ethyl 2-acetyl-3-(4-chlorophenyl)-4-nitrobutanoate).

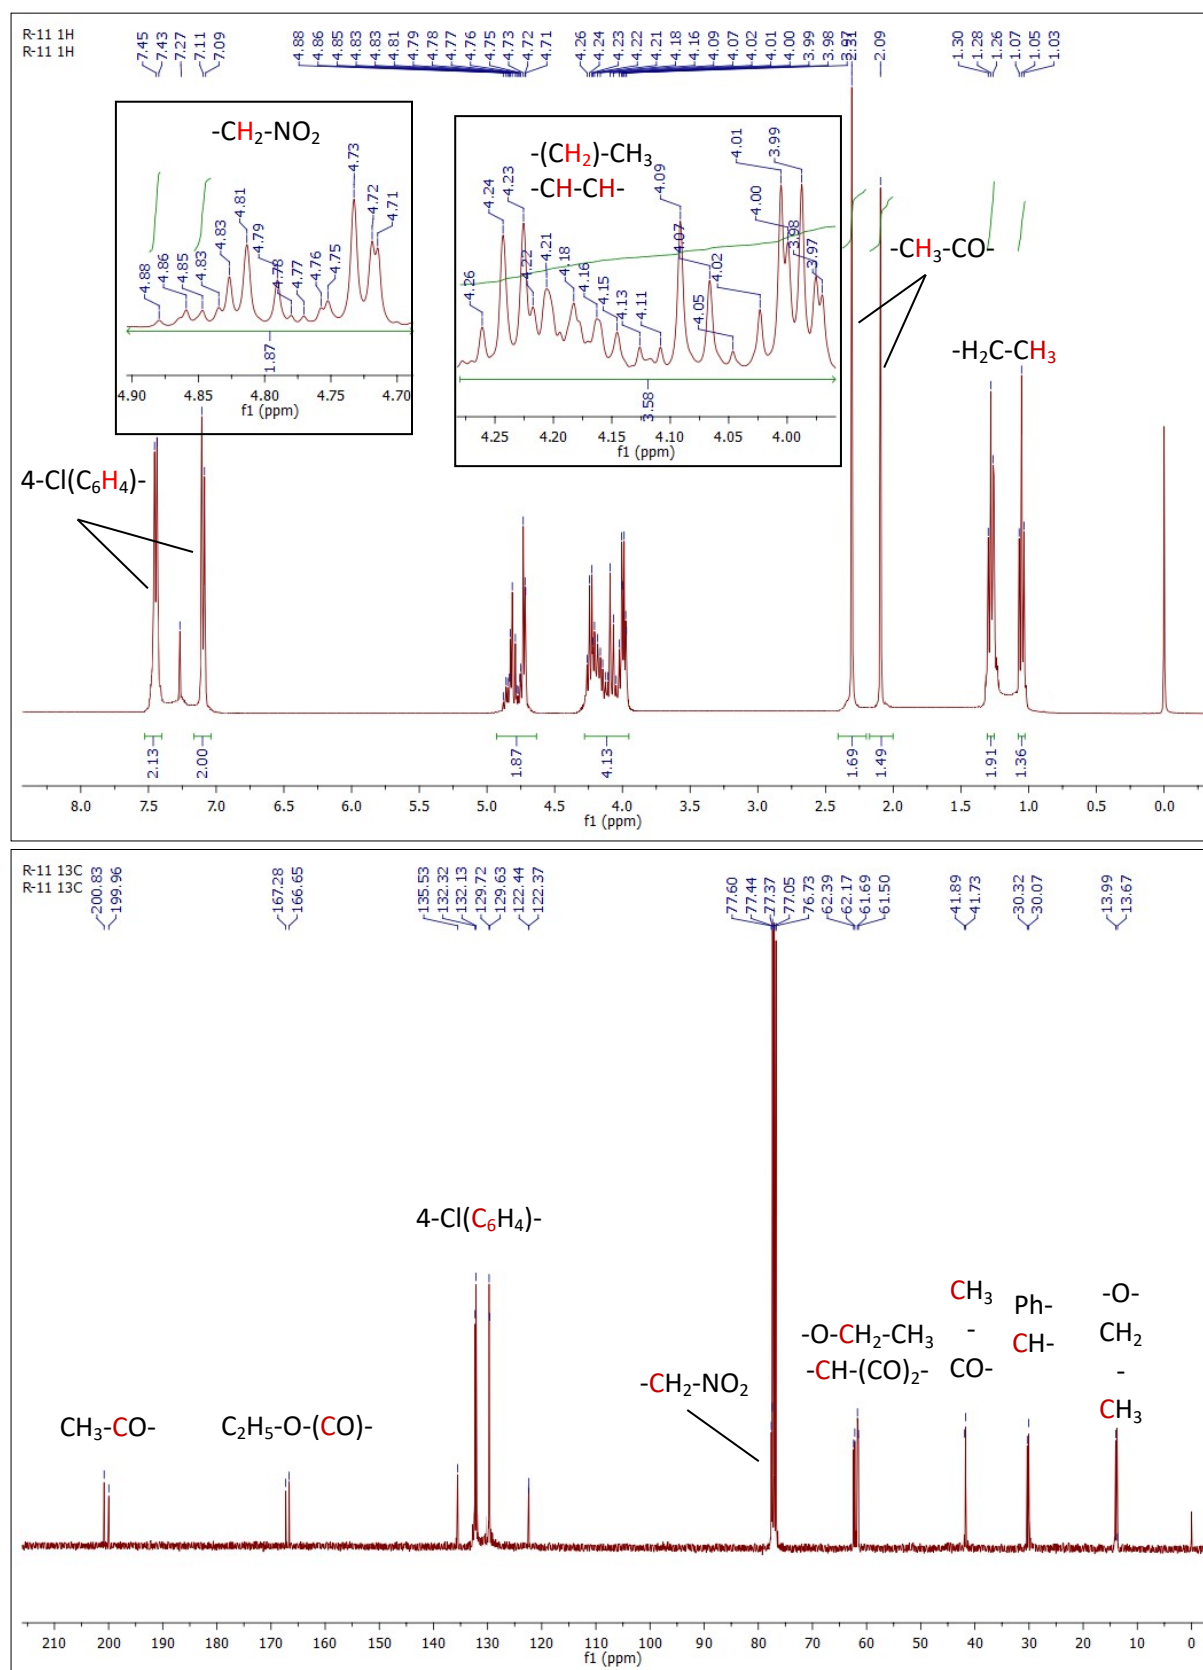



**Figure S16:**  $^1\text{H}$  and  $^{13}\text{C}$  NMR of **3cd** (2-(1-(4-chlorophenyl)-2-nitroethyl)malononitrile).

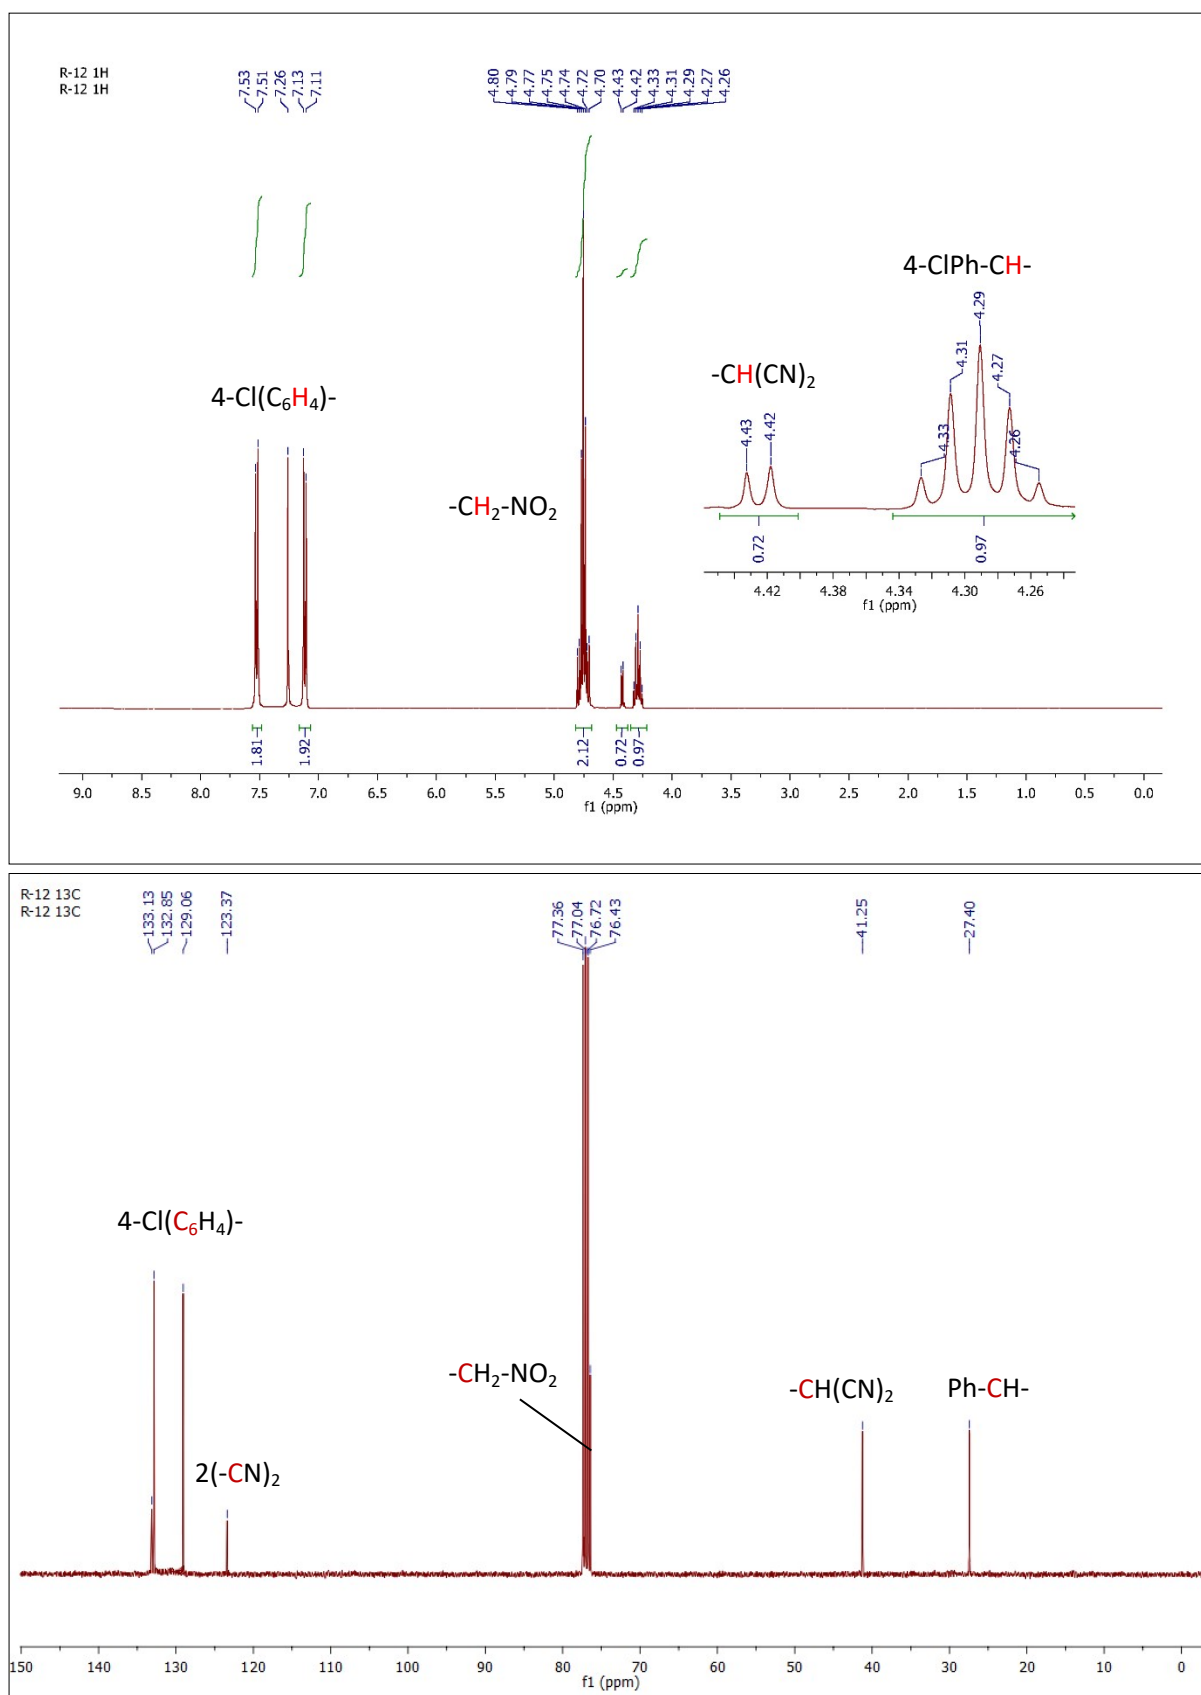

**Figure S17:**  $^1\text{H}$  and  $^{13}\text{C}$  NMR of **3ae** (3-(2-nitro-1-(p-tolyl)ethyl)pentane-2,4-dione).

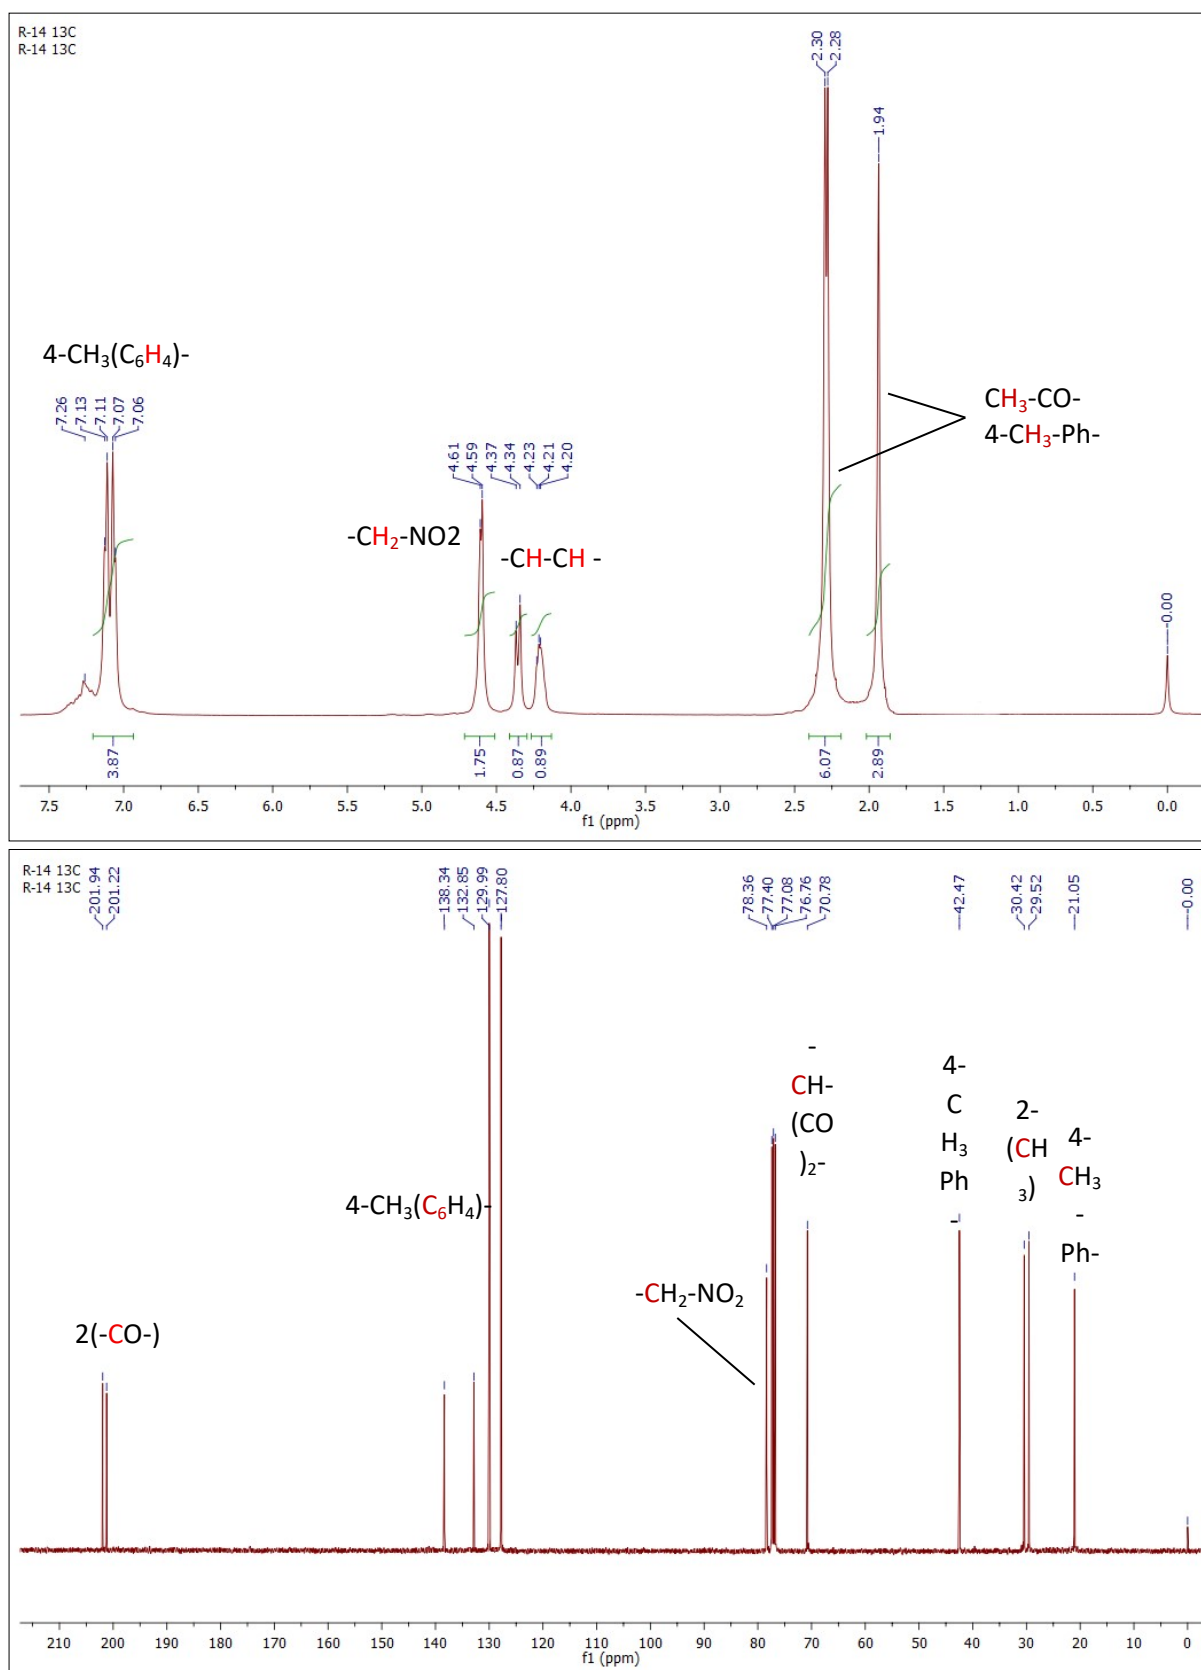

**Figure S18:**  $^1\text{H}$  and  $^{13}\text{C}$  NMR of **3be** (Ethyl 2-acetyl-4-nitro-3-(p-tolyl)butanoate).

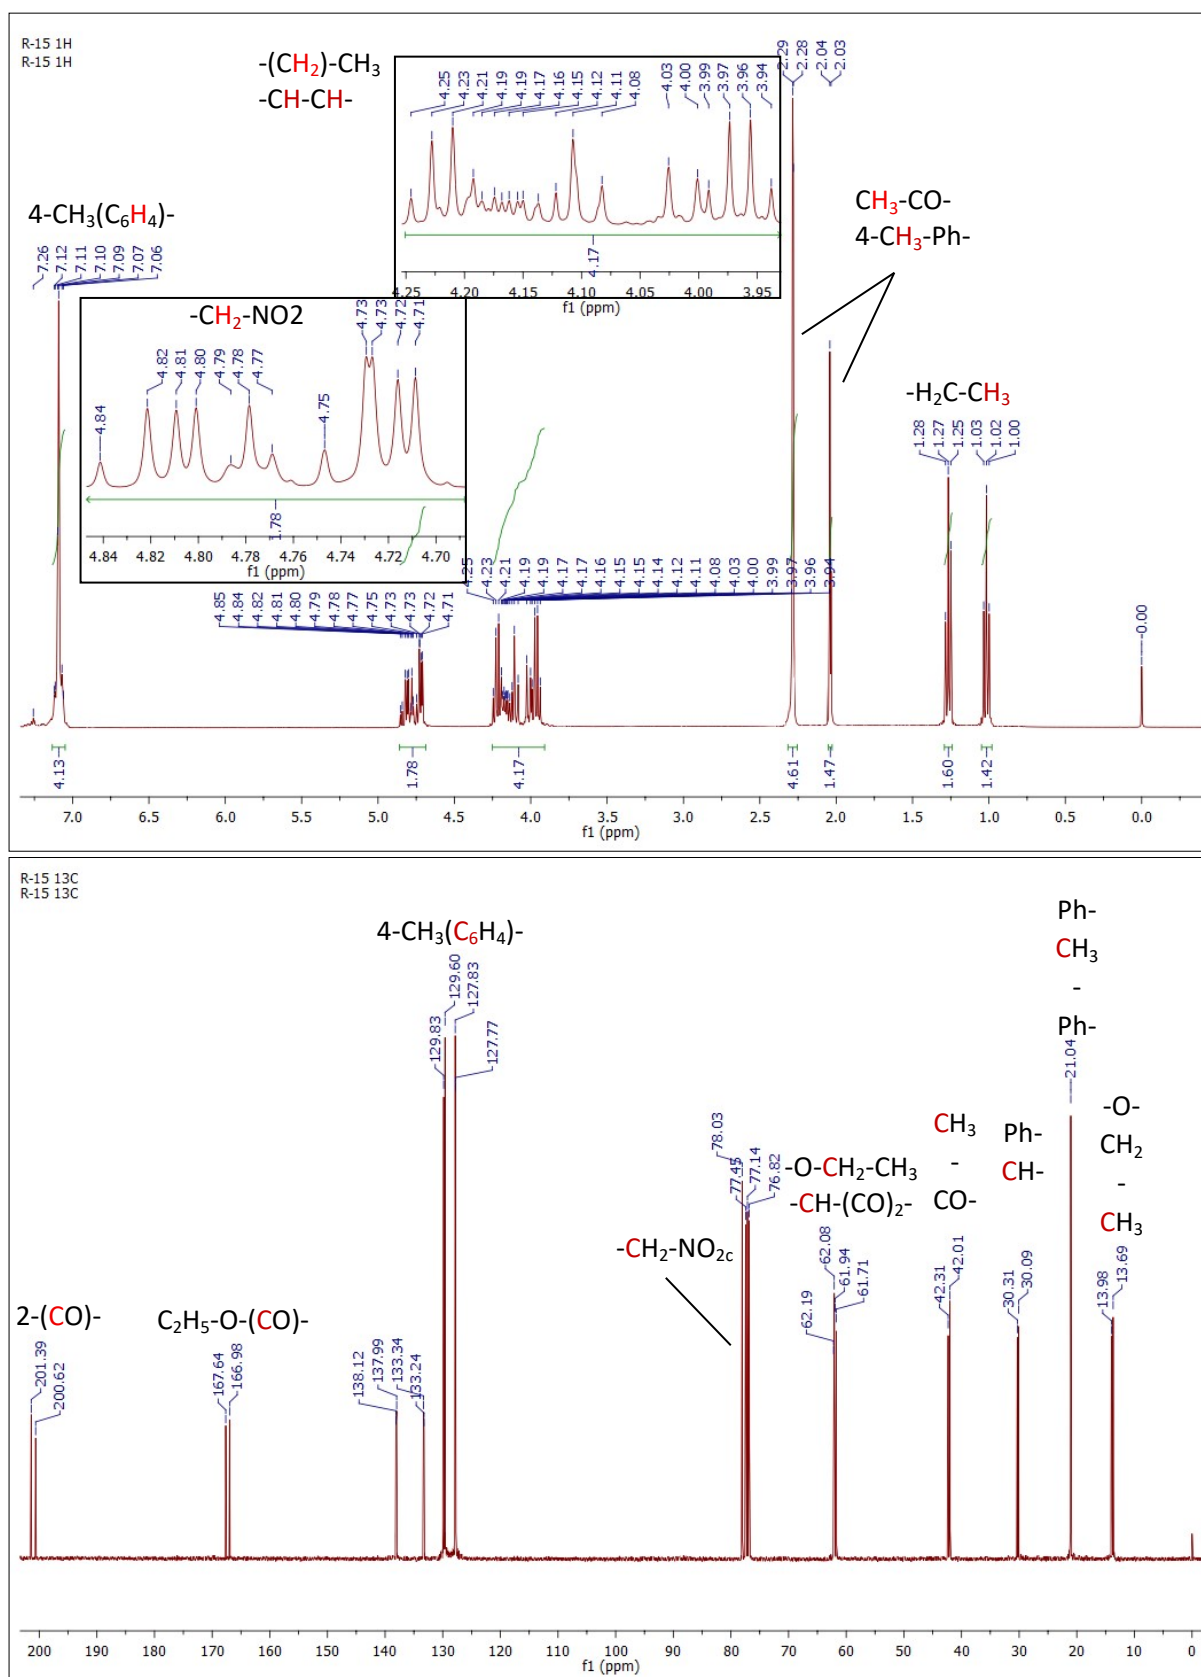

**Figure S19:**  $^1\text{H}$  and  $^{13}\text{C}$  NMR of **3ce** (2-(2-nitro-1-(p-tolyl)ethyl)malononitrile).

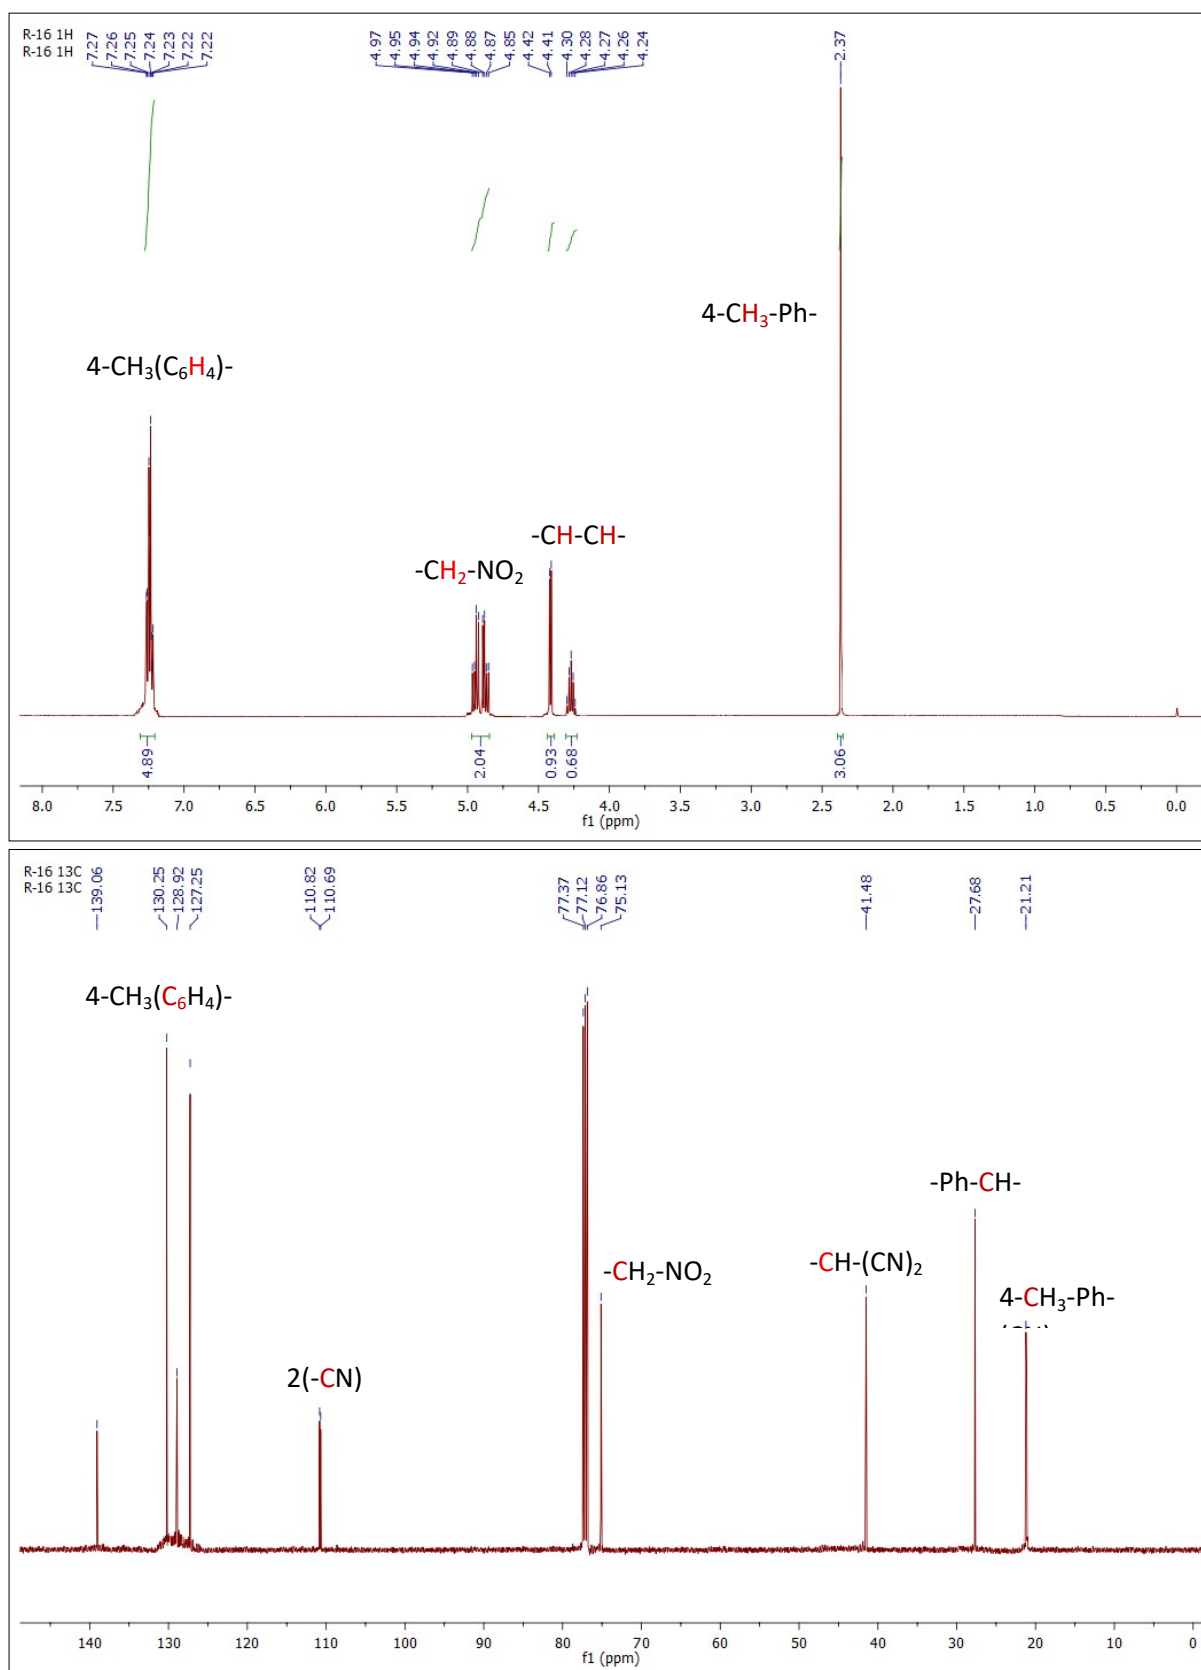

**Figure S20:**  $^1\text{H}$  and  $^{13}\text{C}$  NMR of **3af** (3-(1-(2-methoxyphenyl)-2-nitroethyl)pentane-2,4-dione).

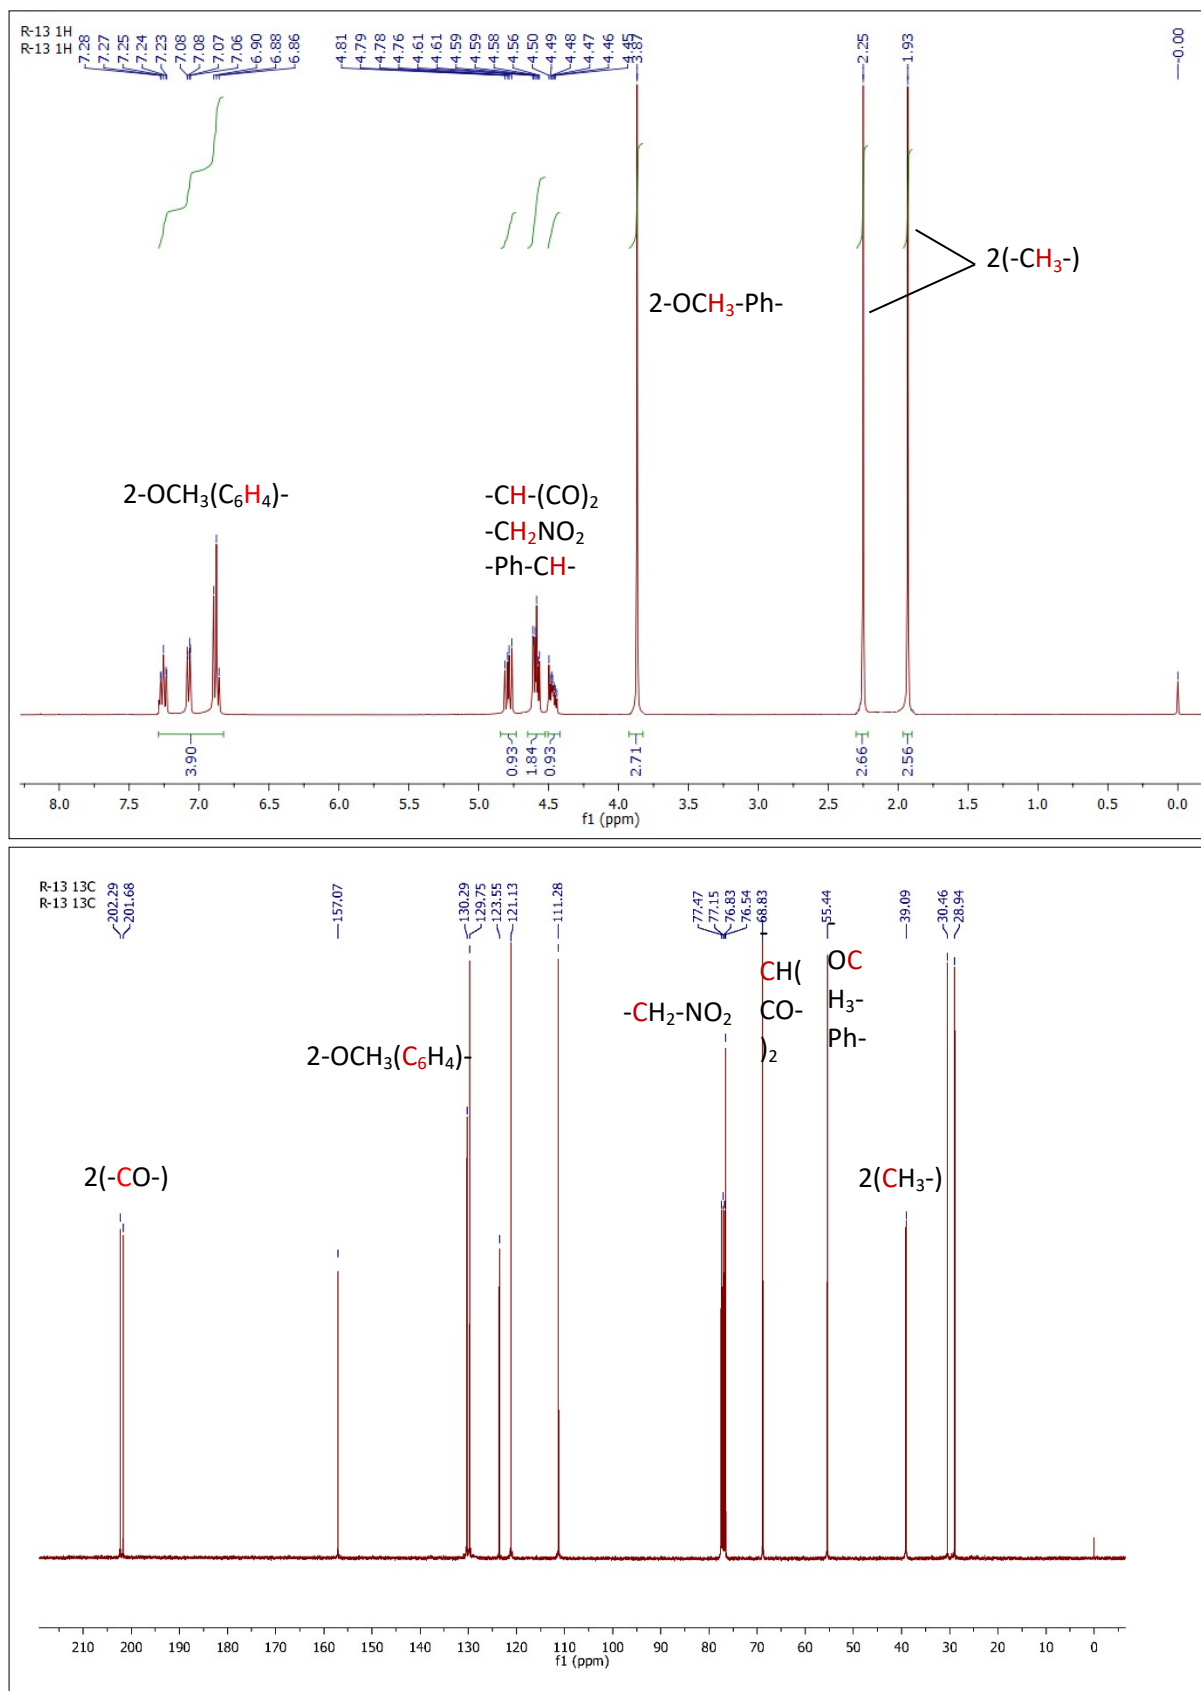

**Table S2: Reusability of DFPA catalyst for Methanolysis of PET waste**

| Cycle            | Time (h) | Catalyst Mas Loss | Yield (%) |
|------------------|----------|-------------------|-----------|
| 1 <sup>st</sup>  | 0.97     | 0.0326            | 98.64     |
| 2 <sup>nd</sup>  | 1        | 0.0331            | 96.32     |
| 3 <sup>rd</sup>  | 1.25     | 0.0329            | 94.72     |
| 4 <sup>th</sup>  | 1.5      | 0.0325            | 93.15     |
| 5 <sup>th</sup>  | 2        | 0.0341            | 91.46     |
| 6 <sup>th</sup>  | 2.25     | 0.0337            | 90.48     |
| 7 <sup>th</sup>  | 2.42     | 0.0334            | 88.49     |
| 8 <sup>th</sup>  | 2.5      | 0.03425           | 87.13     |
| 9 <sup>th</sup>  | 2.7      | 0.0329            | 86.21     |
| 10 <sup>th</sup> | 2.9      | 0.0332            | 84.56     |

**Figure S21: EDX analysis of DFPA after 5<sup>th</sup> cycle**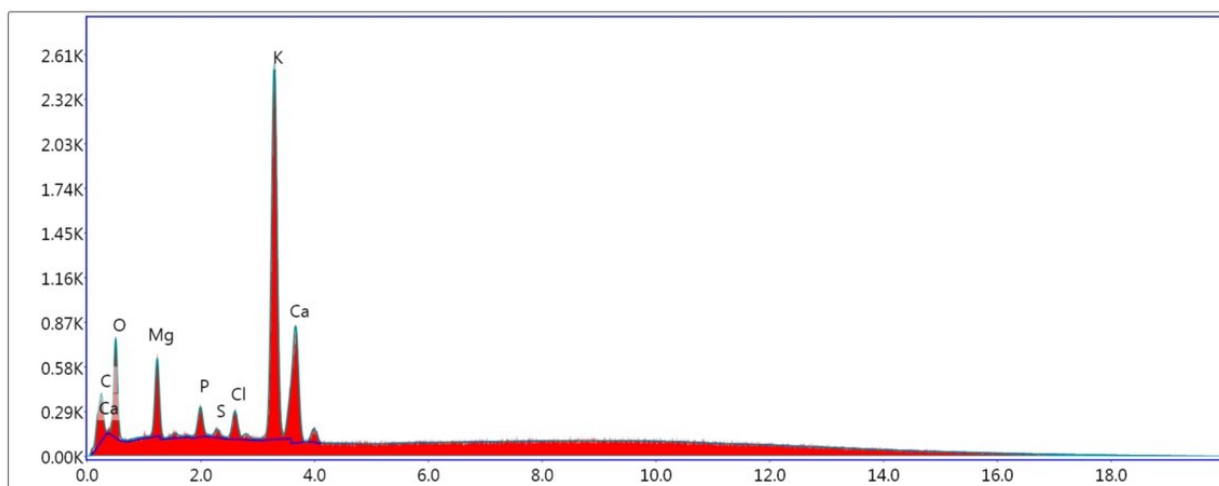

Lsec: 30.0 0 Cnts 0.000 keV Det: Octane Plus Det

| Element | Weight % | Atomic % | Net Int. | Error % | Kratio | Z    | R    | A    | F    |
|---------|----------|----------|----------|---------|--------|------|------|------|------|
| C K     | 4.98     | 9.41     | 45.77    | 13.83   | 0.02   | 1.12 | 0.93 | 0.32 | 1    |
| O K     | 39.55    | 56.12    | 321.24   | 11.01   | 0.05   | 1.08 | 0.96 | 0.13 | 1    |
| MgK     | 5.68     | 5.31     | 295.63   | 8.51    | 0.03   | 1    | 0.99 | 0.48 | 1.01 |
| P K     | 1.85     | 1.35     | 130.49   | 8.75    | 0.01   | 0.94 | 1.01 | 0.81 | 1.03 |
| S K     | 0.45     | 0.32     | 34.46    | 26.31   | 0.00   | 0.96 | 1.02 | 0.87 | 1.05 |
| ClK     | 1.78     | 1.14     | 131.36   | 13.02   | 0.02   | 0.92 | 1.02 | 0.92 | 1.08 |
| K K     | 32.08    | 18.63    | 1,936.14 | 1.99    | 0.29   | 0.91 | 1.04 | 0.97 | 1.03 |
| CaK     | 13.64    | 7.73     | 594.11   | 4.51    | 0.11   | 0.93 | 1.04 | 0.85 | 1    |

**Figure S22: EDX analysis of DFPA catalyst after 10<sup>th</sup> cycle**

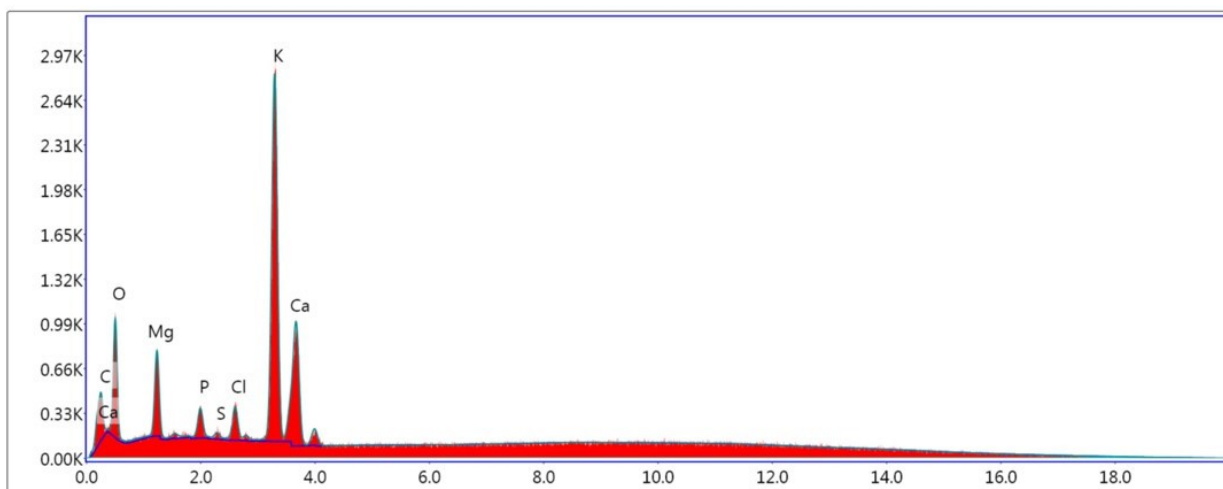

Lsec: 30.0 0 Cnts 0.000 keV Det: Octane Plus Det

| Element | Weight % | Atomic % | Net Int. | Error % | Kratio | Z    | R    | A    | F    |
|---------|----------|----------|----------|---------|--------|------|------|------|------|
| C K     | 5.30     | 9.76     | 58.55    | 13.45   | 0.02   | 1.12 | 0.94 | 0.32 | 1    |
| O K     | 42.27    | 58.38    | 440.96   | 10.76   | 0.06   | 1.07 | 0.96 | 0.13 | 1    |
| Mg K    | 5.86     | 5.32     | 369.46   | 8.19    | 0.03   | 0.99 | 0.99 | 0.47 | 1.01 |
| P K     | 1.73     | 1.23     | 147.51   | 8.40    | 0.01   | 0.94 | 1.01 | 0.81 | 1.03 |
| S K     | 0.32     | 0.22     | 30.31    | 35.70   | 0.00   | 0.96 | 1.02 | 0.87 | 1.05 |
| Cl K    | 1.99     | 1.24     | 177.87   | 10.92   | 0.02   | 0.91 | 1.03 | 0.92 | 1.08 |
| K K     | 29.28    | 16.54    | 2,148.10 | 1.97    | 0.27   | 0.91 | 1.04 | 0.97 | 1.03 |
| Ca K    | 13.25    | 7.31     | 710.43   | 4.14    | 0.11   | 0.92 | 1.04 | 0.86 | 1    |



**Figure S23: SEM images of 5<sup>th</sup> (a) and 10<sup>th</sup> (b) cycle**

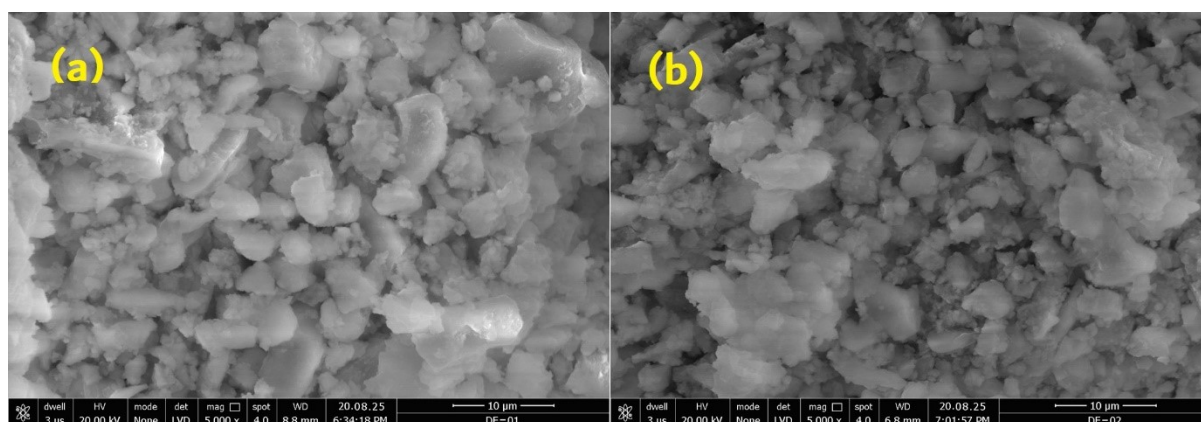

**Figure S24: HPLC data of crude methanolysis product**

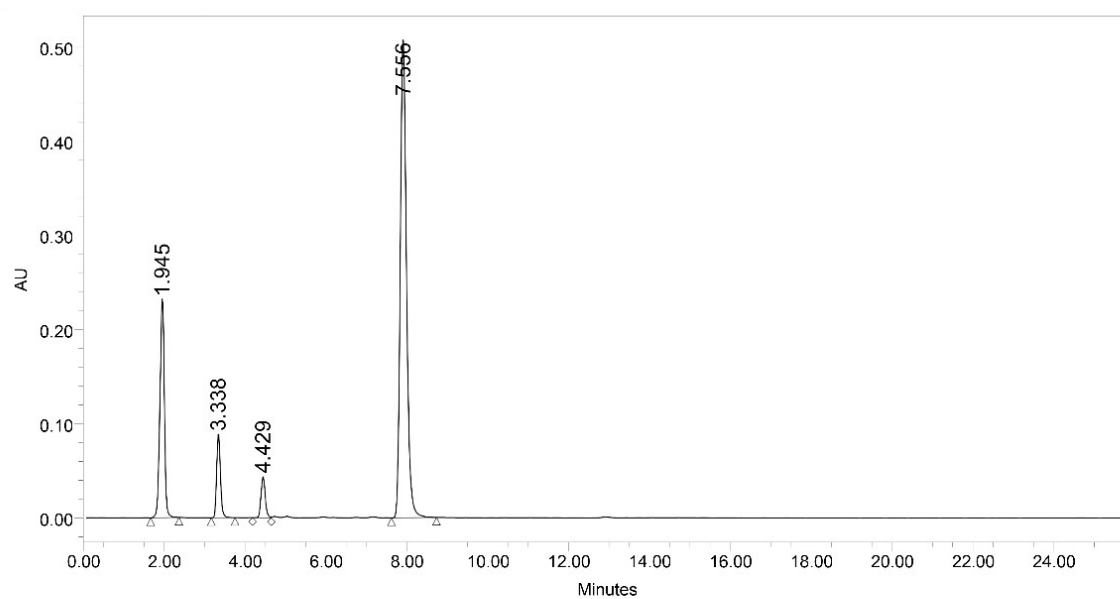

|   | RT<br>(min) | Area<br>( $\mu$ V*sec) | % Area | Height<br>( $\mu$ V) | %<br>Height |
|---|-------------|------------------------|--------|----------------------|-------------|
| 1 | 1.945       | 1878457                | 22.4   | 237014               | 26.57       |
| 2 | 3.338       | 585112                 | 6.93   | 89348                | 10.02       |
| 3 | 4.429       | 321168                 | 3.88   | 43772                | 4.91        |
| 4 | 7.556       | 5598973                | 66.79  | 521936               | 58.51       |

**Figure S25: HPLC data of recrystallized methanolysis product**

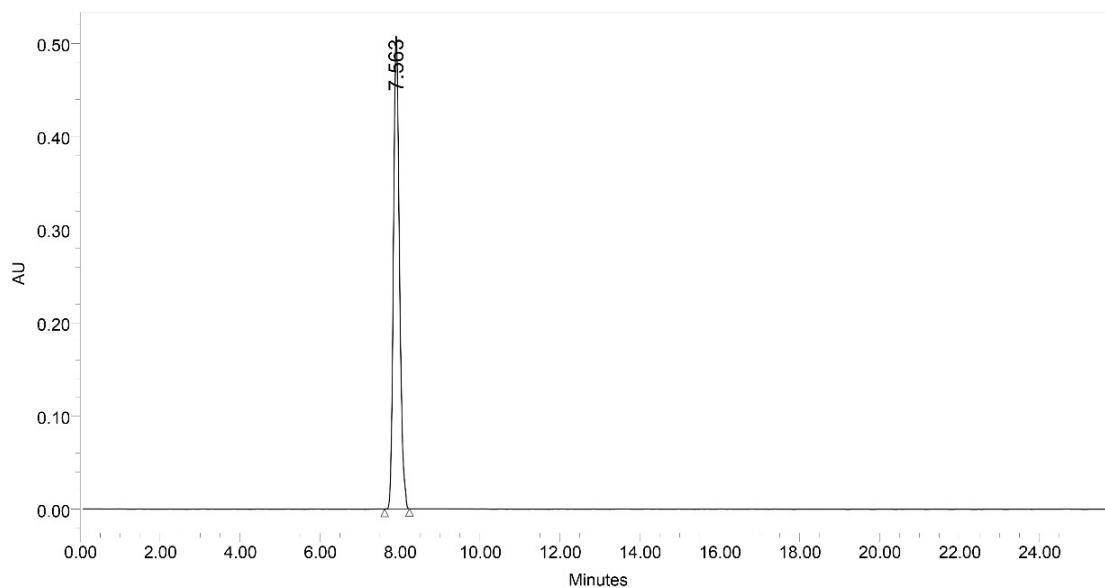

|   | RT<br>(min) | Area<br>( $\mu\text{V}\cdot\text{sec}$ ) | % Area | Height<br>( $\mu\text{V}$ ) | % Height |
|---|-------------|------------------------------------------|--------|-----------------------------|----------|
| 1 | 7.563       | 9560912                                  | 100.00 | 510720                      | 100.00   |

**Figure S26: FT-IR Spectra of methanolysis product**

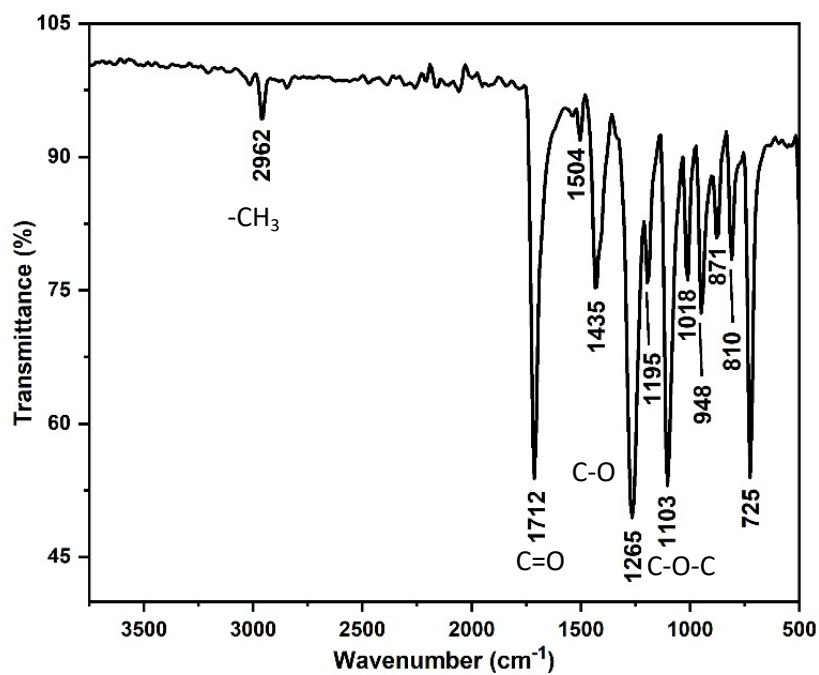

**Figure S27:  $^{13}\text{C}$  NMR spectra of DMT**

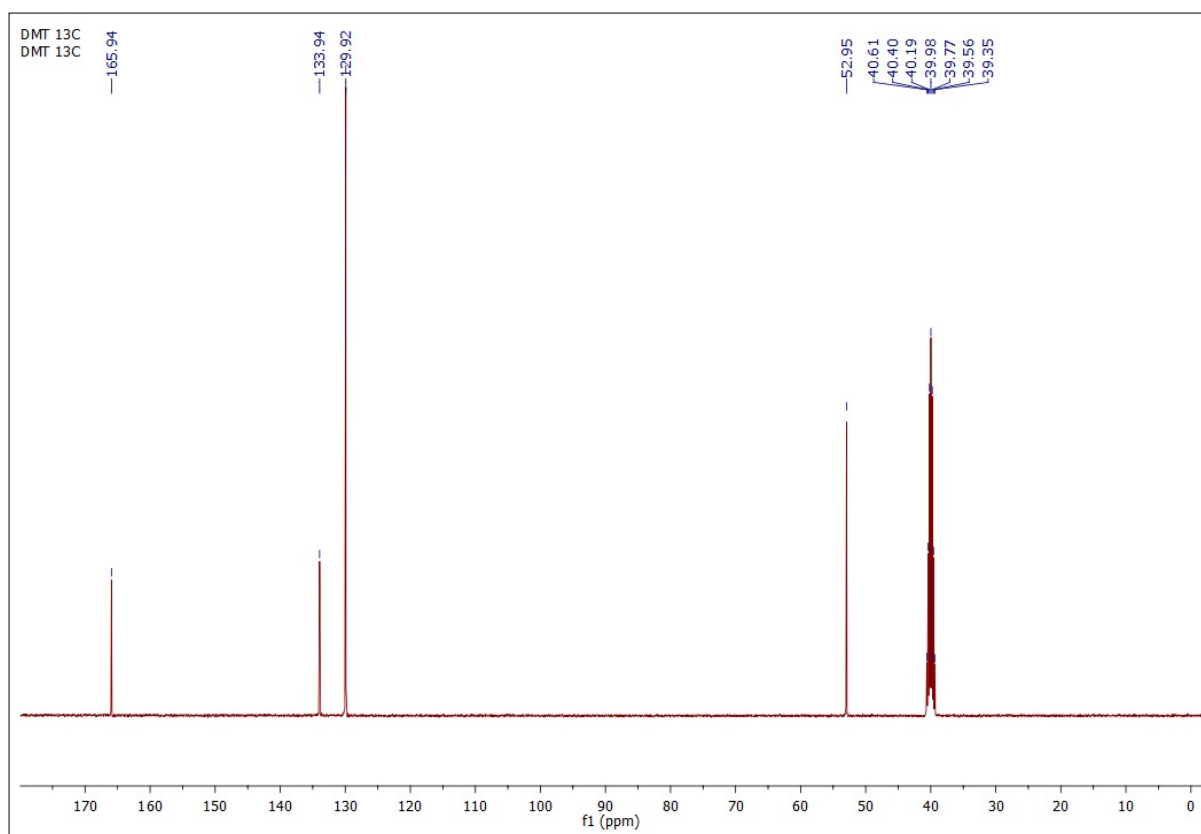

**Figure S28: (a) Leverage vs run plot. (b) Residuals vs run plot**

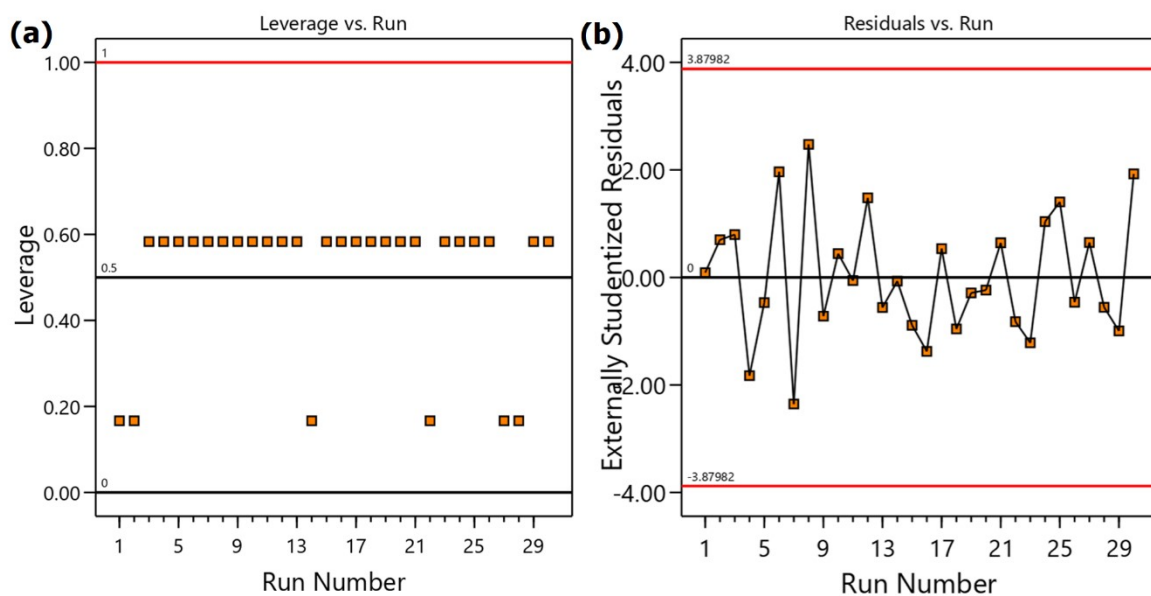

**Table S3: Methanolysis data of colored and labeled PET**

| S/No. | PET  | Recrystallized Yield (%) |
|-------|------|--------------------------|
| 1.    | Blue | 96.15±0.43%              |

|    |       |             |
|----|-------|-------------|
| 2. | Green | 95.84±0.51% |
| 3. | Red   | 95.73±0.62% |
| 4. | Label | 91.52±0.58% |

**Figure S29: (a) UV spectra of colored PET solution. (b) UV spectra of recrystallized colored DMT**

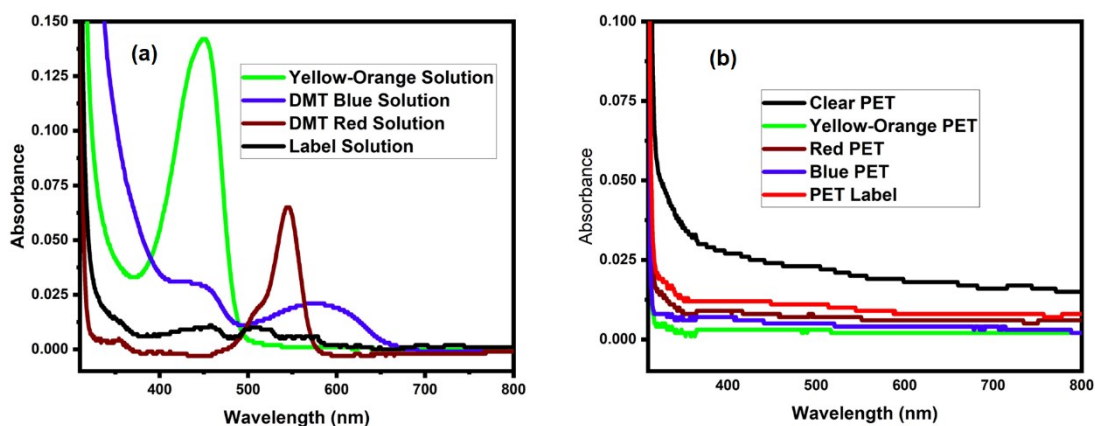

**Table S4: Determination of Energy Input in kWh/Kg(DMT) on methanolysis**

| A. Determination of Total kWh for PET Depolymerization up to 0.01 Kg     |                   |            |              |        |                |
|--------------------------------------------------------------------------|-------------------|------------|--------------|--------|----------------|
| 1.                                                                       | Equipments        | Power (kW) | Time (h)     | kWh    | Total kWh      |
| 2.                                                                       | Heating Mantle    | 0.698      | 1.25         | 0.8725 | 2.63           |
| 3.                                                                       | Referigerator     | 0.09       | 4            | 0.36   |                |
| 4.                                                                       | Hot Air Oven      | 0.8        | 0.5          | 0.4    |                |
| 5.                                                                       | Rotary Evaporator | 2          | 0.16         | 0.32   |                |
|                                                                          |                   |            |              |        |                |
| B. Determination of kWh/DMT at low PET loading and Average Yield Percent |                   |            |              |        |                |
|                                                                          | PET loading       | DMT (kg)   | kWh/DMT (kg) | Yield% | Average Yield% |
| 1.                                                                       | 0.0005            | 0.000498   | 5286.14      | 98.64  | 98.63          |
| 2.                                                                       | 0.001             | 0.000995   | 2645.73      | 98.46  |                |
| 3.                                                                       | 0.005             | 0.00499    | 526.5        | 98.76  |                |
| 4.                                                                       | 0.01              | 0.00997    | 264.04       | 98.66  |                |
|                                                                          |                   |            |              |        |                |

| C. | Estimation of Total kWh for 1 Kg PET                         |            |          |      |           |
|----|--------------------------------------------------------------|------------|----------|------|-----------|
|    | Equipments                                                   | Power (kW) | Time (h) | kWh  | Total kWh |
| 1. | Heating Mantle                                               | 2.63       | 2        | 5.26 | 46.02     |
| 2. | Rotary Evaporator                                            | 2          | 20       | 40   |           |
| 3. | Referigerator                                                | 0.09       | 4        | 0.36 |           |
| 4. | Hot Air Oven                                                 | 0.8        | 0.5      | 0.4  |           |
|    |                                                              |            |          |      |           |
| D. | Estimation of kWh/Kg (DMT) at 1 Kg PET loading. <sup>a</sup> |            |          |      |           |
|    | Unit                                                         |            | Values   |      |           |
| 1. | DMT Yield (Kg)                                               |            | 0.9863   |      |           |
| 2. | kWh/Kg                                                       |            | 46.66    |      |           |

<sup>[a]</sup> DMT yield at 1 Kg PET was estimated from the average yield percent observed in entry B2.

|  | <b>DMT<br/>A</b> | <b>Byproducts<br/>B</b> | <b>Ethyl-<br/>ene<br/>Glycol<br/>C</b> | <b>Metha-<br/>nol<br/>D</b> | <b>Catal-<br/>yst<br/>Recov-<br/>ered</b> | <b>Total Mass<br/>Isolated<br/>[G = A+B+<br/>C+D+E+]</b> | <b>Theo-<br/>retical<br/>Total<br/>Mass</b> | <b>Total<br/>Loss<br/>I =<br/>[H-</b> |
|--|------------------|-------------------------|----------------------------------------|-----------------------------|-------------------------------------------|----------------------------------------------------------|---------------------------------------------|---------------------------------------|
|--|------------------|-------------------------|----------------------------------------|-----------------------------|-------------------------------------------|----------------------------------------------------------|---------------------------------------------|---------------------------------------|

**Table S5: Green Metrics of Methanolysis reaction**

| S/N     | Data   | Methanol | Catalyst | DM T Yield | Ethylene Glycol | Oligomers | Side Products | Total Waste | Mass of Useful Product | H-E-factor | GPI  |
|---------|--------|----------|----------|------------|-----------------|-----------|---------------|-------------|------------------------|------------|------|
| Run 1   | 0.498  | A        | 0.0047   | 0.1453     | 3.84            | 0.0321    | [G = A+B+C]   | 4.52        | 5.0555                 | I =        | 0.54 |
| Run 2   | 0.499  | A        | 0.0048   | 0.1521     | 3.79            | 0.0318    | [E+F]         | 4.48        | [H = C+D]              | G/H        | 0.58 |
| Run 3   | 0.497  | A        | 0.0056   | 0.0142     | 3.88            | 0.0332    |               | 4.43        | 5.0555                 |            | 0.62 |
| ±       | 0.0018 |          | 0.0004   | 0.0097     | 0.09            | 0.0014    |               | 0.08        |                        |            | 0.08 |
| Average | 0.4983 | 3.84     | 0.0327   | 0.4983     | 0.1466          | 0.0049    | 0.0005        | 0.6833      | 0.6773                 | 1.06       | 2.06 |
| ±age    | 0.4983 |          | 0.0049   | 0.1466     | 3.84            | 0.03237   |               | 4.52        | 5.0555                 |            | 0.54 |
| Loss    | 0.674  |          | 0.00392  |            |                 |           |               |             |                        |            |      |

**Table S6: Mass Balance of Methanolysis Reaction**

**Table S7: Green Metrics of Michael Addition Reaction**

| Nitrostyrene (g)<br>A | Catalyst (g)<br>B | Michael Product Yield (g)<br>C | Theoretical Yield (g)<br>D | Nitrostyrene Converted (g)<br>[E = 95% of 0.14915] | Nitrostyrene Unconverted (g)<br>[F = A-E] | Total Waste (g)<br>[G = B+F] | E-Factor<br>[H = G/D] | PMI<br>[I = H+1] |
|-----------------------|-------------------|--------------------------------|----------------------------|----------------------------------------------------|-------------------------------------------|------------------------------|-----------------------|------------------|
| 0.17898               | 0.0149            | 0.237                          | 0.249                      | 0.142                                              | 0.037                                     | 0.052                        | 0.22                  | 1.22             |

**References:**

1. Khiangte V, Lalmangaihzualla S, Laldinpuii ZT, Nunnemi L, Muthukumaran RB, Vanlaldinpuia K. 2023 Novel dragon fruit peel ash-derived solid catalyst for biodiesel production and PET waste recycling. *Bioresour Technol Rep* 24, 101663. (doi:10.1016/J.BITEB.2023.101663)
2. Laskar IB, Gupta R, Chatterjee S, Vanlalveni C, Rokhum L. 2020 Taming waste: Waste *Mangifera indica* peel as a sustainable catalyst for biodiesel production at room temperature. *Renew Energy* 161, 207–220. (doi:10.1016/J.RENENE.2020.07.061)
3. Basumatary B, Basumatary S, Das B, Nath B, Kalita P. 2021 Waste *Musa paradisiaca* plant: An efficient heterogeneous base catalyst for fast production of biodiesel. *J Clean Prod* 305, 127089. (doi:10.1016/J.JCLEPRO.2021.127089)
4. Gohain M, Laskar K, Paul AK, Daimary N, Maharana M, Goswami IK, Hazarika A, Bora U, Deka D. 2020 *Carica papaya* stem: A source of versatile heterogeneous catalyst for biodiesel production and C–C bond formation. *Renew Energy* 147, 541–555. (doi:10.1016/j.renene.2019.09.016)

5. Guo X, Shi H, Wei X. 2017 Pore properties, inner chemical environment, and microstructure of nano-modified CFA-WBP (class C fly ash-waste brick powder) based geopolymers. *Cem Concr Compos* 79, 53–61. (doi:10.1016/J.CEMCONCOMP.2017.01.007)
6. Thommes M, Kaneko K, Neimark A V., Olivier JP, Rodriguez-Reinoso F, Rouquerol J, Sing KSW. 2015 Physisorption of gases, with special reference to the evaluation of surface area and pore size distribution (IUPAC Technical Report). *Pure and Applied Chemistry* 87, 1051–1069. (doi:10.1515/PAC-2014-1117)
7. Bardestani R, Patience GS, Kaliaguine S. 2019 Experimental methods in chemical engineering: specific surface area and pore size distribution measurements—BET, BJH, and DFT. *Can J Chem Eng* 97, 2781–2791. (doi:10.1002/CJCE.23632)
8. Basumatary B, Brahma S, Nath B, Basumatary SF, Das B, Basumatary S. 2023 Post-harvest waste to value-added materials: Musa champa plant as renewable and highly effective base catalyst for *Jatropha curcas* oil-based biodiesel production. *Bioresour Technol Rep* 21, 101338. (doi:10.1016/J.BITEB.2023.101338)
9. Changmai B, Sudarsanam P, Rokhum L. 2020 Biodiesel production using a renewable mesoporous solid catalyst. *Ind Crops Prod* 145. (doi:10.1016/j.indcrop.2019.111911)
